# Supplementary material for: Multicolor photoluminescence of Cu14 clusters modulated using surface ligands
Source: Royal Society of Chemistry journal article supplement (doi:10.1039/d4sc01566e), 2024-01-01
Supplement: d4sc01566e1.pdf [file d4sc01566e1.pdf]

## Supporting Information

### Multicolor Photoluminescence of Cu<sub>14</sub> Cluster Modulated by Surface Ligands

Arijit Jana<sup>a</sup>, Subrata Duary<sup>a</sup>, Amitabha Das<sup>b</sup>, Amoghavarsha Ramachandra Kini<sup>a</sup>, Swetashree Acharya<sup>a</sup>, Jan Machacek<sup>c</sup>, Biswarup Pathak<sup>b\*</sup>, Tomas Base<sup>c\*</sup> and Thalappil Pradeep<sup>a\*</sup>

<sup>a</sup>DST Unit of Nanoscience (DST UNS) and Thematic Unit of Excellence (TUE), Department of Chemistry, Indian Institute of Technology, Madras, Chennai – 600036, India

<sup>b</sup>Department of Chemistry, Indian Institute of Technology Indore, Indore 453552, India

<sup>c</sup>Department of Syntheses, Institute of Inorganic Chemistry, The Czech Academy of Sciences, 1001 Husinec – Rez, 25068, Czech Republic

\* [pradeep@iitm.ac.in](mailto:pradeep@iitm.ac.in), [tbase@iic.acs.cz](mailto:tbase@iic.acs.cz), [biswarup@iiti.ac.in](mailto:biswarup@iiti.ac.in)

#### Table of content

| Sl. No   | Content                                                                                                                     | Page no |
|----------|-----------------------------------------------------------------------------------------------------------------------------|---------|
|          | Instrumentation                                                                                                             | 2-5     |
| Table S1 | Crystal data and structure refinement for Cu <sub>14</sub> -DMF cluster                                                     | 6       |
| Table S2 | Atomic coordinates and equivalent isotropic displacement parameters for Cu <sub>14</sub> -DMF cluster                       | 7       |
| Table S3 | Anisotropic displacement parameters for Cu <sub>14</sub> -DMF cluster                                                       | 8       |
| Table S4 | Hydrogen coordinates and isotropic displacement parameters for Cu <sub>14</sub> -DMF cluster                                | 9       |
| Fig. S1  | Collision energy dependent MSMS fragmentation pattern of the selected molecular ion peak of Cu <sub>14</sub> cluster        | 10      |
| Fig. S2  | Collision energy dependent MSMS fragmentation pattern of the selected molecular ion peak of Cu <sub>14</sub> -DMF cluster   | 11      |
| Fig. S3  | Optical microscopic images of Cu <sub>14</sub> -DMF crystals                                                                | 12      |
| Fig. S4  | FESEM micrographs of cuboidal Cu <sub>14</sub> -DMF crystals at different magnifications                                    | 12      |
| Fig. S5  | EDS spectral profile and elemental mapping of Cu <sub>14</sub> -DMF crystals                                                | 13      |
| Fig. S6  | Negative ion mode ESI mass spectrum of the Cu <sub>14</sub> -DMF crystals                                                   | 13      |
| Fig. S7  | Comparative PXRD pattern of Cu <sub>14</sub> -DMF                                                                           | 14      |
| Fig. S8  | Structural skeleton of the [Cu <sub>14</sub> O <sub>2</sub> (DMF) <sub>6</sub> ] skeleton with marked interatomic distances | 15      |
| Fig. S9  | Distances between the two opposite centroids of the carborane ligands of the Cu <sub>14</sub> -DMF cluster                  | 15      |
| Fig. S10 | Interatomic distances between two free oxygens present in the Cu <sub>14</sub> -DMF cluster                                 | 16      |
| Fig. S11 | Comparative IR spectra of <i>ortho</i> -carborane 9,12-dithiol ligand, Cu <sub>14</sub> and Cu <sub>14</sub> -DMF clusters  | 16      |
| Fig. S12 | Comparative XPS spectra of Cu <sub>14</sub> and Cu <sub>14</sub> -DMF clusters                                              | 17      |
| Fig. S13 | Comparative Cu LMM Auger spectra of Cu <sub>14</sub> and Cu <sub>14</sub> -DMF clusters                                     | 18      |
| Fig. S14 | Thermogravimetric (TG) and differential analysis (DTA) traces of Cu <sub>14</sub> cluster                                   | 18      |

|          |                                                                                                                                                               |    |
|----------|---------------------------------------------------------------------------------------------------------------------------------------------------------------|----|
| Fig. S15 | TG and DTA traces of Cu <sub>14</sub> -DMF cluster                                                                                                            | 19 |
| Fig. S16 | Photoluminescence excitation spectra of Cu <sub>14</sub> and Cu <sub>14</sub> -DMF clusters                                                                   | 19 |
| Fig. S17 | Luminescence decay profile of as prepared Cu <sub>14</sub> cluster and Cu <sub>14</sub> -DMF cluster in solution and solid state                              | 20 |
| Fig. S18 | PL emission spectra of Cu <sub>14</sub> and Cu <sub>14</sub> -DMF clusters upon oxygen exposure in their respective solution                                  | 20 |
| Fig. S19 | Comparative UV-vis absorption spectrum of Cu <sub>14</sub> -DMF cluster shows the matching of the experimental and simulated spectrum                         | 21 |
| Fig. S20 | Kohn-Sham electronic energy level diagram for Cu <sub>14</sub> -DMF cluster                                                                                   | 21 |
| Fig. S21 | Frontier molecular orbitals of Cu <sub>14</sub> and Cu <sub>14</sub> -DMF clusters                                                                            | 22 |
| Fig. S22 | Luminescence decay profiles of green and yellow emitting Cu <sub>14</sub> -fibers at room temperature                                                         | 23 |
| Fig. S23 | Oxygen sensitivity PL studies of green emitting Cu <sub>14</sub> -fibers                                                                                      | 23 |
| Fig. S24 | Comparative IR spectra of Cu <sub>14</sub> -DMF cluster and Cu <sub>14</sub> -fibers                                                                          | 24 |
| Fig. S25 | Comparative IR spectra of free DPPE and Cu <sub>14</sub> -fibers                                                                                              | 25 |
| Fig. S26 | Comparative XPS spectra of Cu <sub>14</sub> -DMF and Cu <sub>14</sub> -fibers                                                                                 | 26 |
| Fig. S27 | TG and DTG analysis of Cu <sub>14</sub> -fibers                                                                                                               | 26 |
| Fig. S28 | Photographs of the Cu <sub>14</sub> -fibers under UV light and after its dissolution in DMF. PL emission profile of the fiber, and the extracted DMF solution | 27 |
| Fig. S29 | Positive ion mode ESI-MS spectrum of Cu <sub>14</sub> -fibers after dissolving them in DMF                                                                    | 27 |
| Fig. S30 | Negative ion mode ESI-MS spectrum of Cu <sub>14</sub> -fibers after dissolving them in DMF                                                                    | 28 |
| Fig. S31 | Optimized structural models of most probable bindings of DPPE linkers with the Cu <sub>14</sub> -DMF cluster                                                  | 28 |
| Fig. S32 | A comparative energy profile of the probable binding of DPPE linkers at the various position of the Cu <sub>14</sub> -DMF cluster                             | 29 |
| Fig. S33 | Characterization of the of Cu <sub>18</sub> nanocluster through UV-vis absorption and mass spectrometric studies                                              | 29 |
|          | References                                                                                                                                                    | 30 |

## Instrumentation

### a) UV-vis absorption spectroscopy

UV-vis absorption spectra were measured in the wavelength range of 1100-200 nm using Perkin Elmer Lambda 365 UV-vis spectrometer, equipped with a bandpass filter of 1 nm. The scan rate of spectral acquisition is 100 nm/min.

### **b) Mass spectrometry**

Mass spectra of the clusters were measured by Waters Synapt G2Si HDMS instrument. The instrument is equipped with a nano-electrospray ionization source, mass selected ion trap, ion mobility cells, and time of flight mass analyzer. Optimized operating conditions such as flow rate 10-15  $\mu\text{L}/\text{min}$ , capillary voltage 2-3 kV, cone voltage 20 V, source offset 10 V, desolvation gas flow 400 L/min, source temperature 100  $^{\circ}\text{C}$  and desolvation temperature 150  $^{\circ}\text{C}$  were used for the measurements. Collision-induced dissociation (CID) studies were performed upon colliding the selected molecular ion with argon gas inside the trap cell of the instrument. Gradually increasing the collision energy (CE 0 to 200 for  $\text{Cu}_{14}$  and CE 0 to 100 for  $\text{Cu}_{14}\text{-DMF}$ ) leads to the fragmentation of the species. All the measurements used low concentrations ( $\sim 1 \mu\text{g}/\text{ml}$ ) of cluster samples.

### **c) Photoluminescence spectroscopy**

Photoluminescence spectra were measured using Horiba Jobin Yvon Nanolog spectrometers by applying 3 nm bandpass filter having a resolution bandwidth of 5 nm. The Nanolog instrument has a 450 W Xenon-arc lamp source, double monochromator with gratings, associated reflective optics, and CCD detector. Samples dissolved in the respective solvents were placed inside the 1 cm quartz cuvette to measure the spectrum.

### **Calculation of the relative quantum yield**

We used our previously synthesized  $\text{Cu}_4\text{-ICBT}$  cluster (which has an emission maximum at 595 nm with an absolute quantum yield (QY) of 18% at room temperature) as a standard.<sup>1</sup> The relative quantum yield (RQY) of these  $\text{Cu}_{14}$  clusters was calculated using the following equation.

$$\text{RQY-sample} = \text{QY-std} * \text{Exc.-std} * \text{Area (PL-sample)} / \text{Exc.-sample} * \text{Area (PL-std)}$$

$$\text{RQY Cu}_{14}\text{-solid} = 10.04 \pm 2.1 \% ; \text{RQY Cu}_{14}\text{-DMF solid} = 23.14 \pm 1.5 \%$$

$$\text{RQY Cu}_{14}\text{-solution} = 4.6 \pm 1.2 \% ; \text{RQY Cu}_{14}\text{-DMF solution} = 15.05 \pm 2.0 \%$$

$$\text{RQY Cu}_{14}\text{-fiber (green)} = 39.23 \pm 1.3 \% ; \text{RQY Cu}_{14}\text{-fiber (yellow)} = 41.71 \pm 1.1 \%$$

### **d) Optical microscopy**

Optical microscopic images in transmission mode were collected using a LEICA optical microscope equipped with LAS V4.8 software. Polarization of the crystals were checked using an optical polarizer.

#### **e) Scanning electron microscope**

Scanning electron microscopic (SEM) images are recorded using a Verios G4 UC, Thermo Scientific field emission scanning electron microscope (FESEM). After transferring the sample on the carbon tape, gold sputtering was performed to increase the conductivity of the sample. All the FESEM images were collected in high vacuum at an operating voltage of 10-15 kV. Energy dispersive analysis of X-ray (EDAX) was performed using the same instrument.

#### **f) Infrared spectroscopy**

FT-IR spectra were measured in the transmission mode using a JASCO-4100 FT-IR spectrometer after preparing potassium bromide (KBr) pellets of the respective samples.

#### **g) X-ray photoelectron spectroscopy**

X-ray photoelectron spectroscopy (XPS) was performed using an Omicron Nanotechnology ESCA probe TPD spectrometer, equipped with polychromatic dual Mg K $\alpha$  ( $h\nu = 1253.6$  eV) and Al K $\alpha$  ( $h\nu = 1486.6$  eV) X-ray source. Clusters were drop casted onto the XPS grid for the measurements. Binding energy of the spectral regions of different elements were calibrated with respect to C 1s (285.0 eV).

#### **h) Thermogravimetric analysis**

Thermogravimetric measurements in the temperature range of 25 to 800 °C were measured using a NETZSCH STA 449 F3 Jupiter instrument equipped with Proteus-6.1.0 software. About 3-4 mg of crystalline sample was loaded in an alumina crucible for the measurement. Nitrogen and argon were used as protective environments. Thermal flow rate of the measurement was 10 °C/min.

#### **i) TCSPC measurement**

Time resolved PL lifetime measurements were performed using Horiba DeltaFlex time-correlated single photon count (TCSPC) spectrometer equipped with Horiba Delta diode 405 nm laser. Resulted emissive photons were collected using Horiba PPD-850 detector. The triexponential fittings of the decay curve was performed by deconvolution procedure of DAS6 (v. 6.8, Horiba Jobin Yvon) software.

#### **j) Single crystal X-ray diffraction**

Single crystal X-ray diffraction (SC-XRD) data collection was performed with Bruker D8 VENTURE single crystal X-ray diffractometer equipped with monochromatic Mo K $\alpha$  ( $\lambda =$

0.71073 Å) or Cu K $\alpha$  ( $\lambda = 1.54178$  Å) radiations and PHOTON 100 CMOS detector. The data collection was performed at 200-296 K based on the requirement of the specific crystals. The automatic cell determination routine, with 24 frames at two different orientations of the detector was employed to collect reflections for unit cell determination. Further, intensity data for structure determination were collected through an optimized strategy which gave an average 4-fold redundancy. The program APEX3-S SAINT (Bruker, 2016) was used for integrating the frames, followed by a multi-scan absorption correction using the program SADABS (Bruker, 2016). The structure was solved by SHELXT-2014 (Sheldrick, 2014) and refined by full-matrix least squares techniques using SHELXL-2018, (Sheldrick, 2018) software package. Hydrogens on all carbon and boron atoms were fixed at calculated positions and refined by rigid body constrains with C-H or B-H = 1.10 Å. Sometimes different restraints (DFIX, SIMU, ISOR, DELU, etc.) were applied to their bond distances and thermal parameters ( $U_{ij}$ ) values during refinement to maintain sensible molecular geometry as well as reasonable anisotropic displacement parameter (ADP) values. Moreover, FLAT restraint was needed to be applied for atoms in the phenyl ring to lie in a common plane.

#### **k) Powder X-ray diffraction**

Powder XRD measurements were performed using a D8 Advance Bruker, using Cu K $\alpha$  as the X-ray source (25 kV). Thin samples of clusters were placed on a clean glass slide for measurements.

#### **l) Computational details**

Molecular level Density Functional Theory (DFT) calculations were conducted using the Gaussian 09 D.01 program.<sup>2</sup> The Becke's three-parameter hybrid exchange functional and Lee-Yang-Parr's (B3LYP) correlation functional were implemented in conjunction with the Pople's 6-31G\* basis set for non-metal elements and LANL2DZ-ECP (effective core potential) for Cu atoms.<sup>3-6</sup> For the TD-DFT calculations, 500 singlet-to-singlet excitation energies were considered. Structural optimization was performed for the  $S_0$  and  $S_1$  states of both the clusters. The wavefunction for the hole and electron pair distribution analysis of clusters were calculated using the UB3LYP functional. The Kohn-Sham orbital analysis and hole and electron pair distribution analysis were performed using Multiwfn.<sup>7</sup>

**Table S1.** Crystal data and structure refinement for Cu<sub>14</sub>-DMF cluster

|                                   |                                                                                                                 |          |
|-----------------------------------|-----------------------------------------------------------------------------------------------------------------|----------|
| Identification code               | Arijit-Cu <sub>14</sub>                                                                                         |          |
| Empirical formula                 | C <sub>30</sub> H <sub>102</sub> B <sub>60</sub> Cu <sub>14</sub> N <sub>6</sub> O <sub>8</sub> S <sub>12</sub> |          |
| Formula weight                    | 2598.05                                                                                                         |          |
| Temperature                       | 297(2) K                                                                                                        |          |
| Wavelength                        | 0.71073 Å                                                                                                       |          |
| Crystal system                    | Trigonal                                                                                                        |          |
| Space group                       | R -3:H                                                                                                          |          |
| Unit cell dimensions              | a = 19.5323(4) Å                                                                                                | α = 90°  |
|                                   | b = 19.5323(4) Å                                                                                                | β = 90°  |
|                                   | c = 29.2601(6) Å                                                                                                | γ = 120° |
| Volume                            | 9667.5(4) Å <sup>3</sup>                                                                                        |          |
| Z                                 | 3                                                                                                               |          |
| Density (calculated)              | 1.339 mg/m <sup>3</sup>                                                                                         |          |
| Absorption coefficient            | 2.485 mm <sup>-1</sup>                                                                                          |          |
| F(000)                            | 3858                                                                                                            |          |
| Crystal size                      | 0.260 x 0.250 x 0.200 mm <sup>3</sup>                                                                           |          |
| Theta range for data collection   | 3.262 to 25.000°                                                                                                |          |
| Index ranges                      | -23 ≤ h ≤ 23, -23 ≤ k ≤ 23, -34 ≤ l ≤ 34                                                                        |          |
| Reflections collected             | 48536                                                                                                           |          |
| Independent reflections           | 3786 [R(int) = 0.1415]                                                                                          |          |
| Completeness to theta = 25.000°   | 99.6 %                                                                                                          |          |
| Absorption correction             | Semi-empirical from equivalents                                                                                 |          |
| Max. and min. transmission        | 0.4708 and 0.1730                                                                                               |          |
| Refinement method                 | Full-matrix least-squares on F <sup>2</sup>                                                                     |          |
| Data / restraints / parameters    | 3786 / 219 / 242                                                                                                |          |
| Goodness-of-fit on F <sup>2</sup> | 1.040                                                                                                           |          |
| Final R indices [I > 2σ(I)]       | R1 = 0.0560, wR2 = 0.1588                                                                                       |          |
| R indices (all data)              | R1 = 0.0850, wR2 = 0.1835                                                                                       |          |
| Extinction coefficient            | n/a                                                                                                             |          |
| Largest diff. peak and hole       | 1.028 and -0.657 e.Å <sup>-3</sup>                                                                              |          |

**Table S2.** Atomic coordinates ( $\times 10^4$ ) and equivalent isotropic displacement parameters ( $\text{\AA}^2 \times 10^3$ ) for  $\text{Cu}_{14}$ -DMF cluster.  $U(\text{eq})$  is defined as one third of the trace of the orthogonalized  $U^{ij}$  tensor.

|       | x        | y        | z        | $U(\text{eq})$ |
|-------|----------|----------|----------|----------------|
| Cu(1) | 4841(1)  | 2431(1)  | 7961(1)  | 51(1)          |
| Cu(2) | 6229(1)  | 3797(1)  | 7959(1)  | 43(1)          |
| Cu(3) | 6667     | 3333     | 7174(1)  | 57(1)          |
| O(1)  | 6667     | 3333     | 6390(4)  | 133(4)         |
| O(2)  | 3542(14) | 1600(20) | 7655(14) | 276(10)        |
| N(1)  | 2367(17) | 1460(20) | 7526(14) | 237(9)         |
| C(3)  | 2798(19) | 1110(20) | 7738(17) | 261(9)         |
| C(4)  | 2530(30) | 2200(20) | 7743(17) | 272(16)        |
| C(5)  | 1512(19) | 900(30)  | 7466(17) | 241(15)        |
| N(1') | 2437(15) | 1279(19) | 7420(11) | 230(8)         |
| O(2') | 3547(12) | 2080(20) | 7701(11) | 298(10)        |
| C(3') | 2807(16) | 1860(20) | 7802(11) | 250(9)         |
| C(4') | 3025(19) | 1460(20) | 7066(10) | 234(12)        |
| C(5') | 1653(15) | 1030(20) | 7309(12) | 233(12)        |
| C(1)  | 5050(4)  | 5584(4)  | 7002(2)  | 66(2)          |
| B(3)  | 5077(4)  | 5351(4)  | 7568(3)  | 59(2)          |
| S(1)  | 5424(1)  | 3206(1)  | 7321(1)  | 45(1)          |
| S(2)  | 6361(1)  | 5057(1)  | 8073(1)  | 44(1)          |
| B(10) | 5290(4)  | 4078(4)  | 7216(2)  | 48(2)          |
| B(7)  | 4667(4)  | 4300(4)  | 7568(3)  | 51(2)          |
| B(8)  | 5731(4)  | 4949(4)  | 7567(2)  | 47(2)          |
| B(2)  | 5946(5)  | 5784(4)  | 7209(3)  | 59(2)          |
| B(9)  | 6085(4)  | 5003(4)  | 6996(2)  | 53(2)          |
| B(1)  | 5645(5)  | 5418(5)  | 6641(3)  | 73(2)          |
| C(2)  | 4637(4)  | 4782(4)  | 6688(2)  | 67(2)          |
| B(4)  | 4253(5)  | 4731(5)  | 7216(3)  | 73(2)          |
| B(6)  | 4374(4)  | 3949(5)  | 6997(3)  | 58(2)          |
| B(5)  | 5243(5)  | 4385(5)  | 6644(3)  | 58(2)          |

**Table S3.** Anisotropic displacement parameters ( $\text{\AA}^2 \times 10^3$ ) for  $\text{Cu}_{14}$ -DMF cluster. The anisotropic displacement factor exponent takes the form:  $-2\pi^2[h^2a^2U^{11} + \dots + 2hkab^*U^{12}]$

|       | $U^{11}$ | $U^{22}$ | $U^{33}$ | $U^{23}$ | $U^{13}$ | $U^{12}$ |
|-------|----------|----------|----------|----------|----------|----------|
| Cu(1) | 51(1)    | 53(1)    | 51(1)    | 1(1)     | 2(1)     | 27(1)    |
| Cu(2) | 46(1)    | 43(1)    | 44(1)    | -2(1)    | -5(1)    | 23(1)    |
| Cu(3) | 54(1)    | 54(1)    | 63(1)    | 0        | 0        | 27(1)    |
| O(1)  | 153(7)   | 153(7)   | 93(8)    | 0        | 0        | 76(3)    |
| O(2)  | 279(12)  | 253(13)  | 278(12)  | -26(11)  | -20(11)  | 121(10)  |
| N(1)  | 246(12)  | 237(12)  | 241(12)  | -4(10)   | -48(10)  | 130(10)  |
| C(3)  | 266(12)  | 253(12)  | 266(12)  | -15(10)  | -21(10)  | 131(9)   |
| C(4)  | 280(20)  | 260(20)  | 260(20)  | 13(19)   | -44(19)  | 114(18)  |
| C(5)  | 270(20)  | 220(20)  | 170(20)  | 3(18)    | -114(17) | 72(17)   |
| N(1') | 242(11)  | 236(11)  | 239(12)  | -9(10)   | -46(10)  | 140(9)   |
| O(2') | 296(13)  | 278(13)  | 290(12)  | -10(11)  | -23(11)  | 122(10)  |
| C(3') | 255(11)  | 247(12)  | 260(11)  | -10(10)  | -27(10)  | 134(9)   |
| C(4') | 255(19)  | 221(18)  | 250(20)  | 4(17)    | -47(17)  | 137(15)  |
| C(5') | 279(19)  | 178(17)  | 160(18)  | 4(15)    | -145(15) | 53(15)   |
| C(1)  | 72(4)    | 65(4)    | 73(5)    | 9(4)     | -13(4)   | 41(4)    |
| B(3)  | 61(4)    | 55(4)    | 67(5)    | 2(4)     | -6(4)    | 34(4)    |
| S(1)  | 47(1)    | 44(1)    | 43(1)    | -2(1)    | -3(1)    | 23(1)    |
| S(2)  | 45(1)    | 43(1)    | 43(1)    | 0(1)     | -1(1)    | 22(1)    |
| B(10) | 45(4)    | 46(4)    | 51(4)    | 3(3)     | -2(3)    | 22(3)    |
| B(7)  | 48(4)    | 53(4)    | 54(4)    | 0(3)     | -6(3)    | 27(3)    |
| B(8)  | 51(4)    | 45(4)    | 49(4)    | 3(3)     | -4(3)    | 27(3)    |
| B(2)  | 58(4)    | 52(4)    | 63(5)    | 8(4)     | -7(4)    | 25(4)    |
| B(9)  | 55(4)    | 49(4)    | 53(4)    | 10(3)    | -3(3)    | 24(3)    |
| B(1)  | 82(6)    | 69(5)    | 65(5)    | 17(4)    | -3(4)    | 36(5)    |
| C(2)  | 73(4)    | 66(4)    | 64(4)    | 5(3)     | -15(4)   | 37(4)    |
| B(4)  | 66(5)    | 84(6)    | 85(6)    | 3(5)     | -12(4)   | 49(5)    |
| B(6)  | 52(4)    | 55(4)    | 65(5)    | 4(4)     | -9(4)    | 26(4)    |
| B(5)  | 65(5)    | 62(5)    | 48(4)    | 3(3)     | -8(3)    | 33(4)    |



**Table S4.** Hydrogen coordinates ( $\times 10^4$ ) and isotropic displacement parameters ( $\text{\AA}^2 \times 10^3$ ) for the  $\text{Cu}_{14}$ -DMF cluster.

|        | x    | y    | z    | U(eq) |
|--------|------|------|------|-------|
| H(3)   | 2586 | 637  | 7900 | 313   |
| H(4A)  | 2235 | 2405 | 7591 | 408   |
| H(4B)  | 2381 | 2108 | 8059 | 408   |
| H(4C)  | 3086 | 2577 | 7720 | 408   |
| H(5A)  | 1272 | 1177 | 7325 | 361   |
| H(5B)  | 1435 | 472  | 7275 | 361   |
| H(5C)  | 1272 | 706  | 7759 | 361   |
| H(3')  | 2588 | 2008 | 8035 | 300   |
| H(4'1) | 3528 | 1617 | 7206 | 350   |
| H(4'2) | 2870 | 994  | 6883 | 350   |
| H(4'3) | 3064 | 1876 | 6877 | 350   |
| H(5'1) | 1353 | 941  | 7585 | 349   |
| H(5'2) | 1630 | 1430 | 7130 | 349   |
| H(5'3) | 1435 | 548  | 7137 | 349   |
| H(1)   | 4968 | 6089 | 6924 | 80    |
| H(2)   | 5021 | 5670 | 7862 | 70    |
| H(2A)  | 4350 | 3937 | 7866 | 62    |
| H(4)   | 6443 | 6381 | 7275 | 71    |
| H(5)   | 6678 | 5093 | 6928 | 64    |
| H(6)   | 5943 | 5774 | 6337 | 87    |
| H(7)   | 4263 | 4733 | 6394 | 80    |
| H(8)   | 3665 | 4656 | 7282 | 88    |
| H(9)   | 3866 | 3362 | 6921 | 69    |
| H(10)  | 5291 | 4077 | 6341 | 69    |

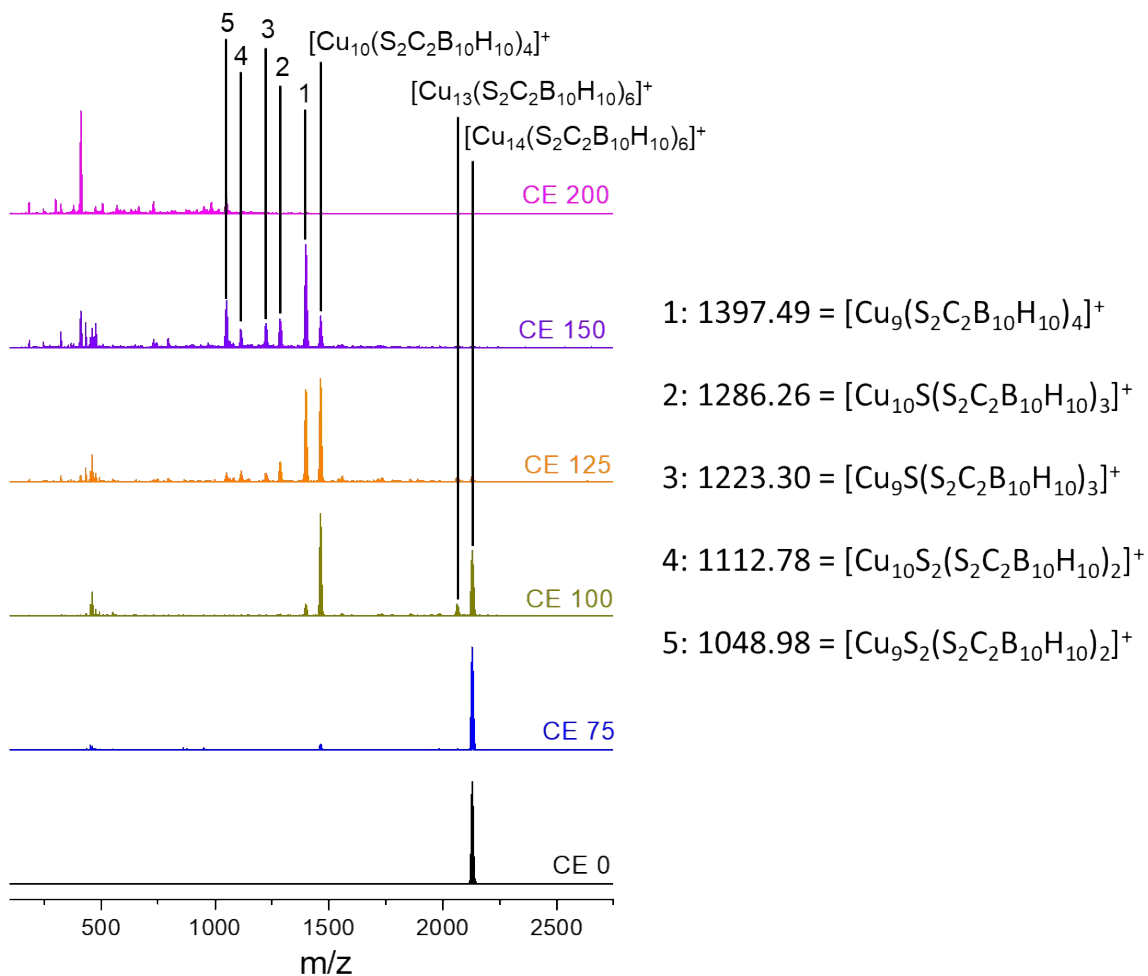

**Fig. S1** Collision energy dependent MSMS fragmentation patterns of the selected molecular ion peak (at  $m/z$  2127.74) of the  $Cu_{14}$  cluster. Losses of metal kernels and surface ligands from the parent cluster were observed at higher CE.

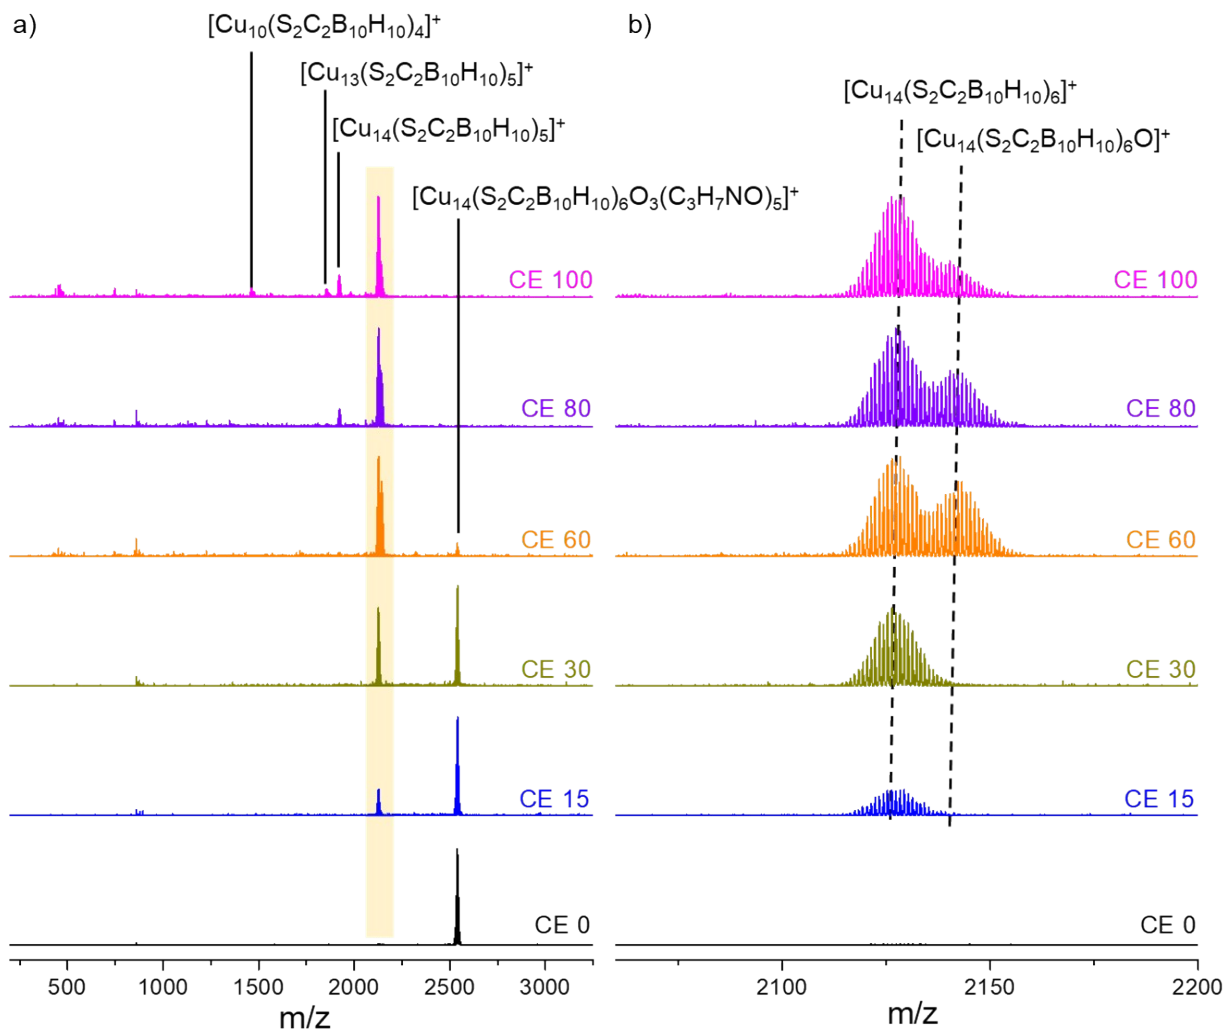

**Fig. S2** a) Collision energy dependent MSMS fragmentation patterns of the selected molecular ion peak (at  $m/z$  2540.9) of the  $\text{Cu}_{14}$ -DMF cluster. Losses of metal kernels and surface ligands were observed from the parent cluster at higher CE. b) Expanded view of the highlighted region.

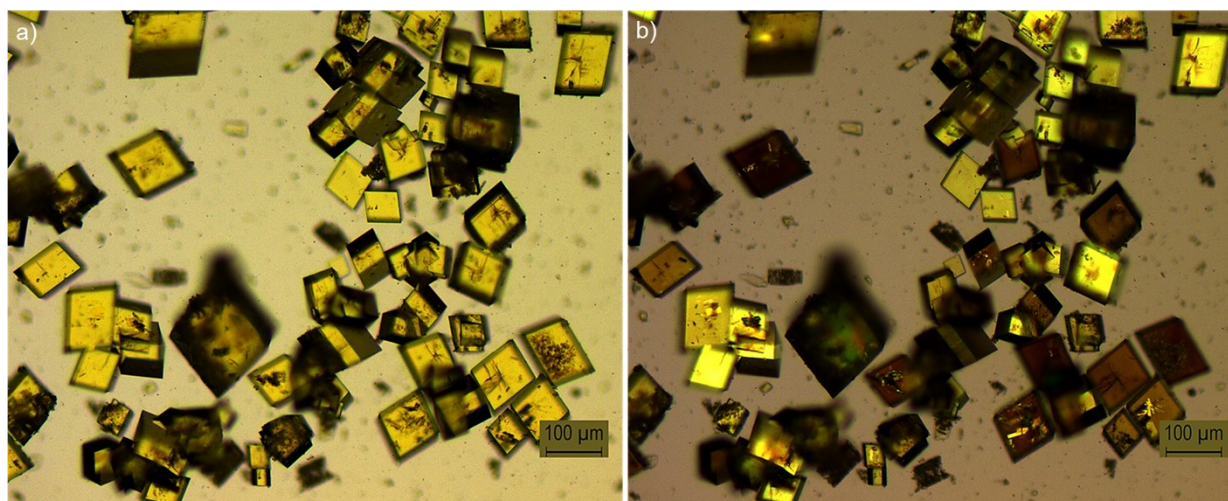

**Fig. S3** Optical microscopic images of cuboidal shaped  $\text{Cu}_{14}$ -DMF crystals a) without polarizer and b) with polarizer.

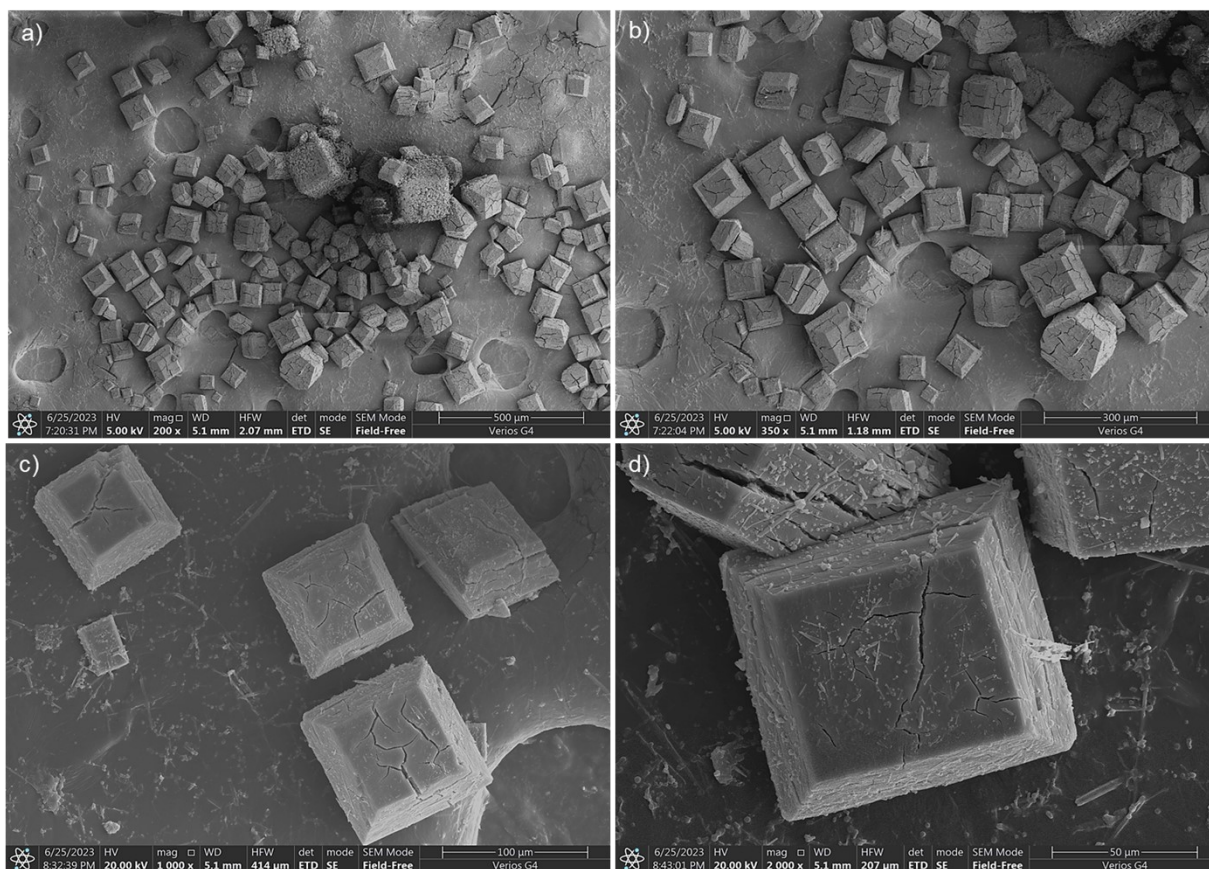

**Fig. S4** a-d) Field emission scanning electron micrograph (FESEM) of cuboidal  $\text{Cu}_{14}$ -DMF crystals at different magnifications. The appearance of the cracks in the crystals is due to the effect of solvent drying.

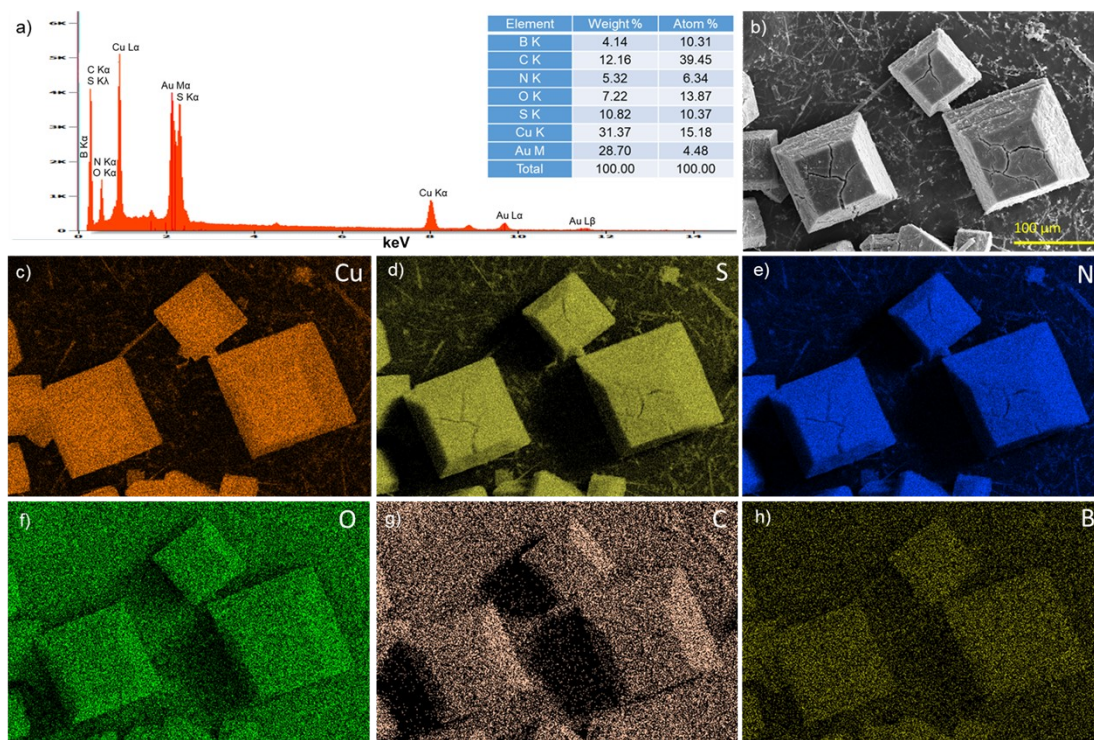

**Fig. S5** a) The EDS spectral profile of  $\text{Cu}_{14}$ -DMF crystals. Inset shows the atomic weight % of various elements present in the crystal. b) FESEM micrograph of the selected crystals used for elemental mapping. c-h) Elemental mapping of the respective elements present in the crystal.

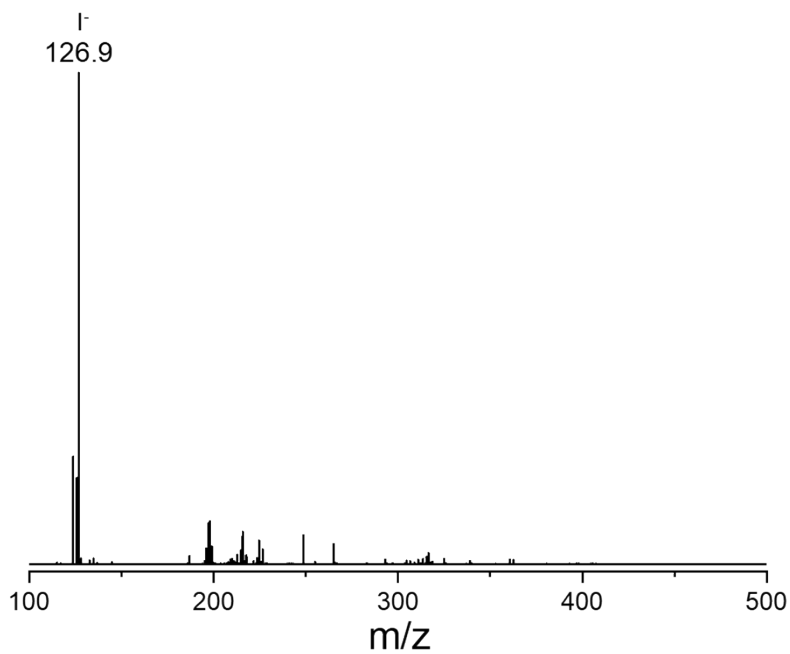

**Fig. S6** Negative ion mode ESI mass spectrum of the  $\text{Cu}_{14}$ -DMF crystals, obtained by dissolving a few crystals in DMF.

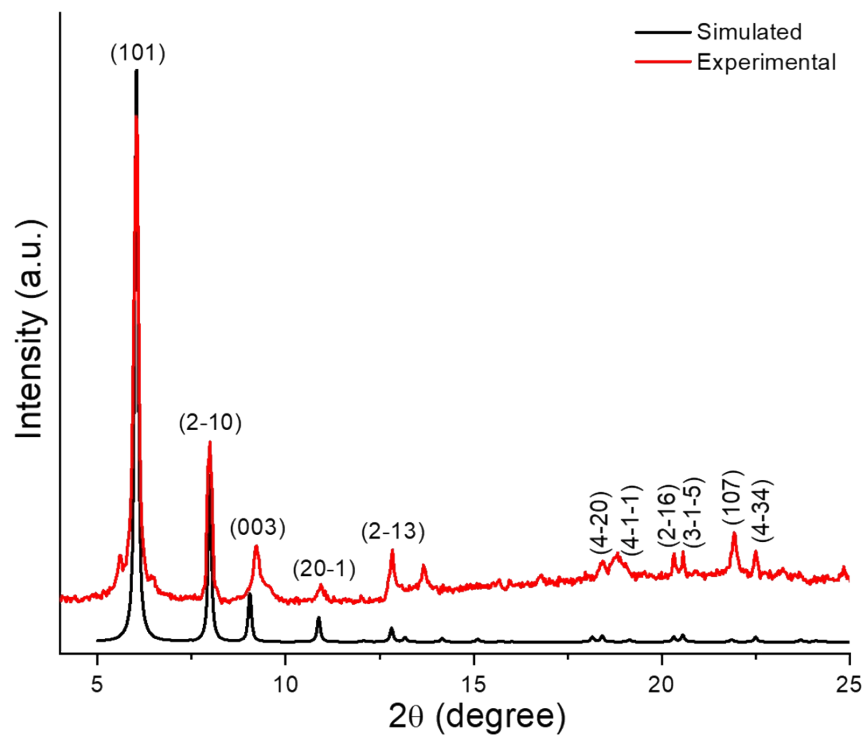

**Fig. S7** Comparative PXRD pattern of Cu<sub>14</sub>-DMF alongside the simulated spectrum derived from single crystal X-ray diffraction.

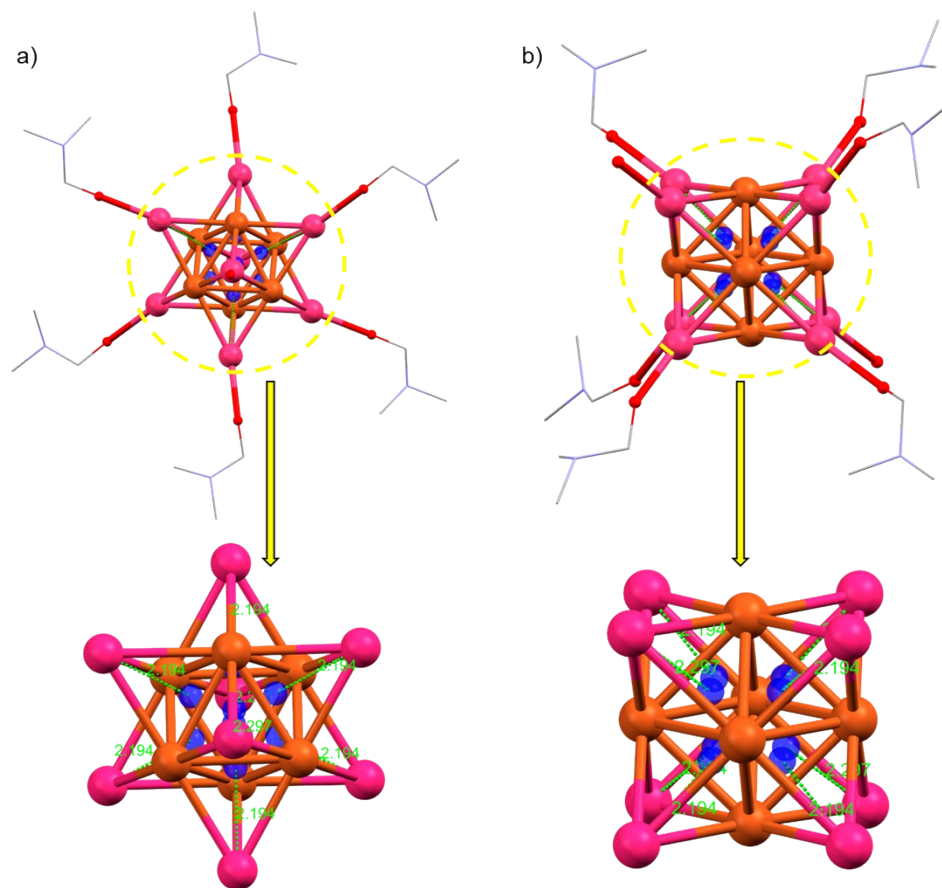

**Fig. S8** Structural skeleton of the  $[\text{Cu}_{14}\text{O}_2(\text{DMF})_6]$  skeleton of  $\text{Cu}_{14}$ -DMF cluster. Distances between the centroids of the  $\text{Cu}_6$  octahedral to the outer capped Cu atoms are marked here.

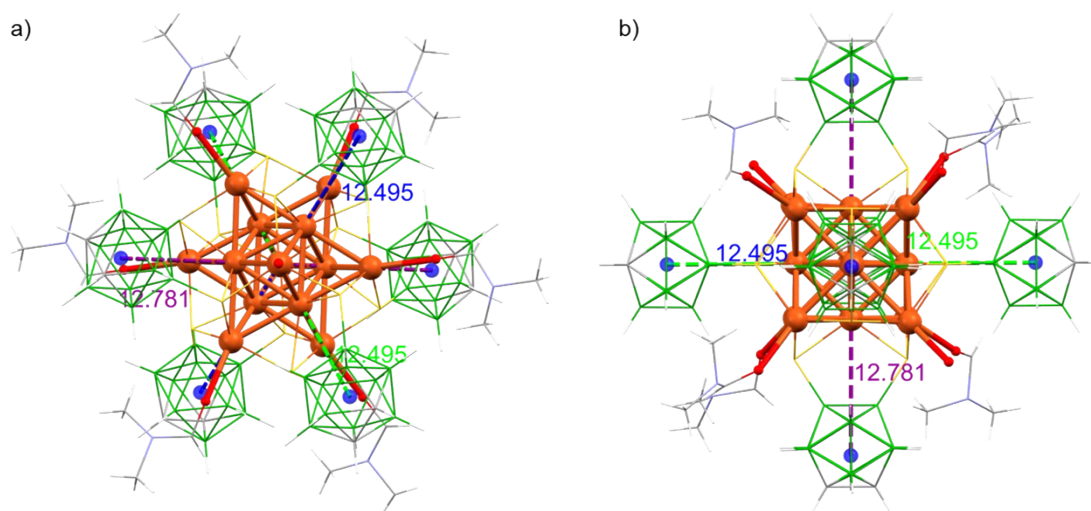

**Fig. S9** Distances between the two opposite centroids of the carborane ligands of the  $\text{Cu}_{14}$ -DMF cluster. a) Top view and b) side view of the cluster.

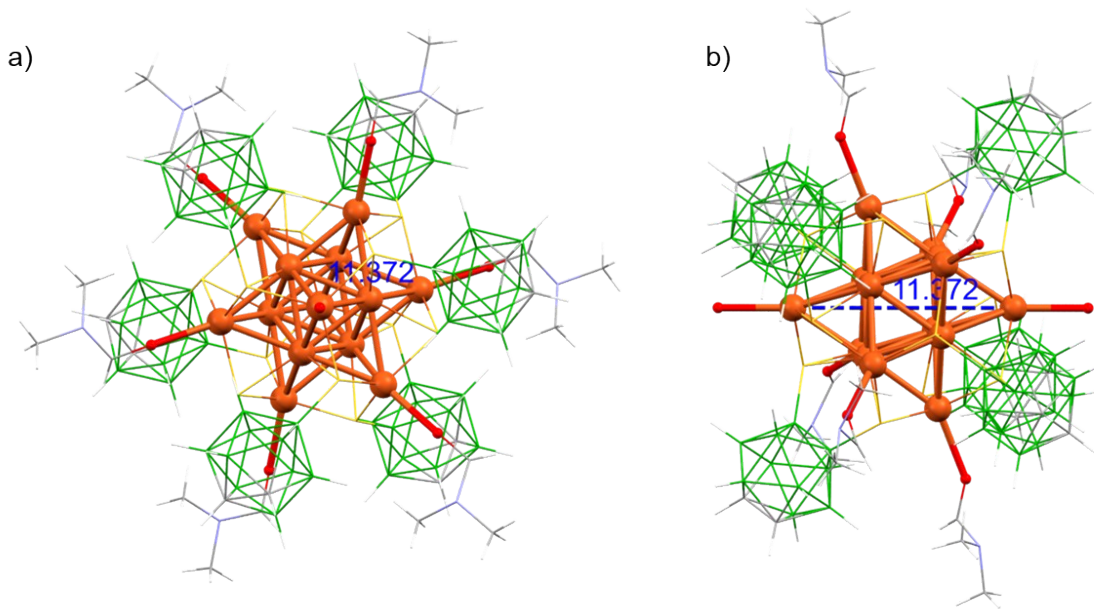

**Fig. S10** Interatomic distances between two free oxygens present in the  $\text{Cu}_{14}$ -DMF cluster. a) Top view and b) side view of the cluster.

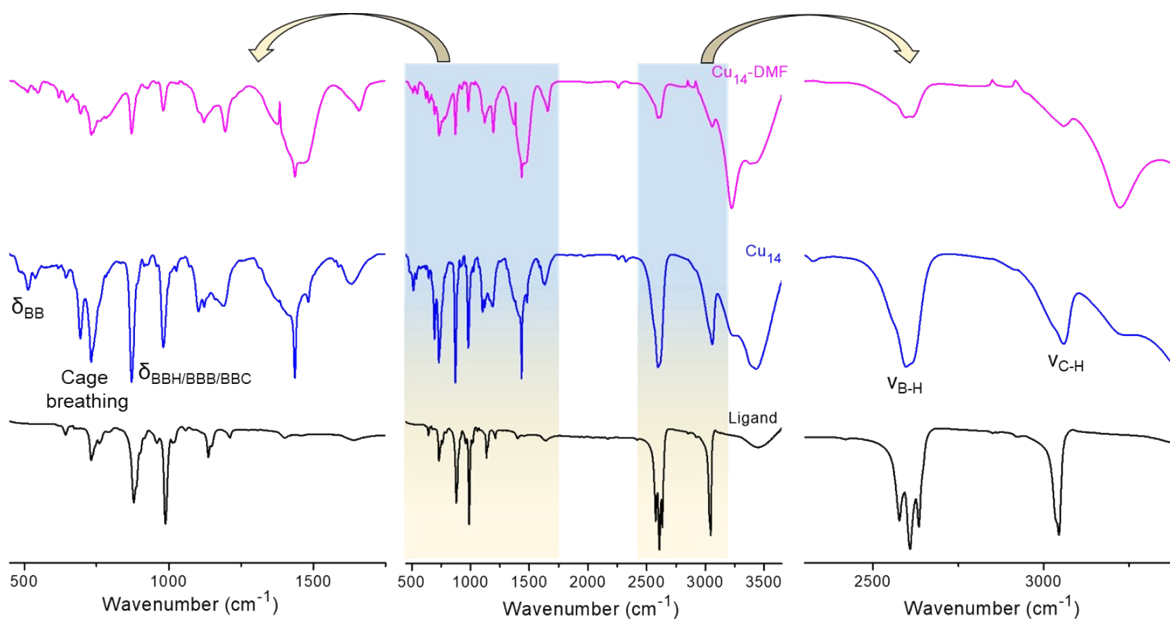

**Fig. S11** Comparative IR spectra of *ortho*-carborane 9,12-dithiol ligand,  $\text{Cu}_{14}$  and  $\text{Cu}_{14}$ -DMF clusters. Expanded views of the highlighted regions with respective assignments are shown.



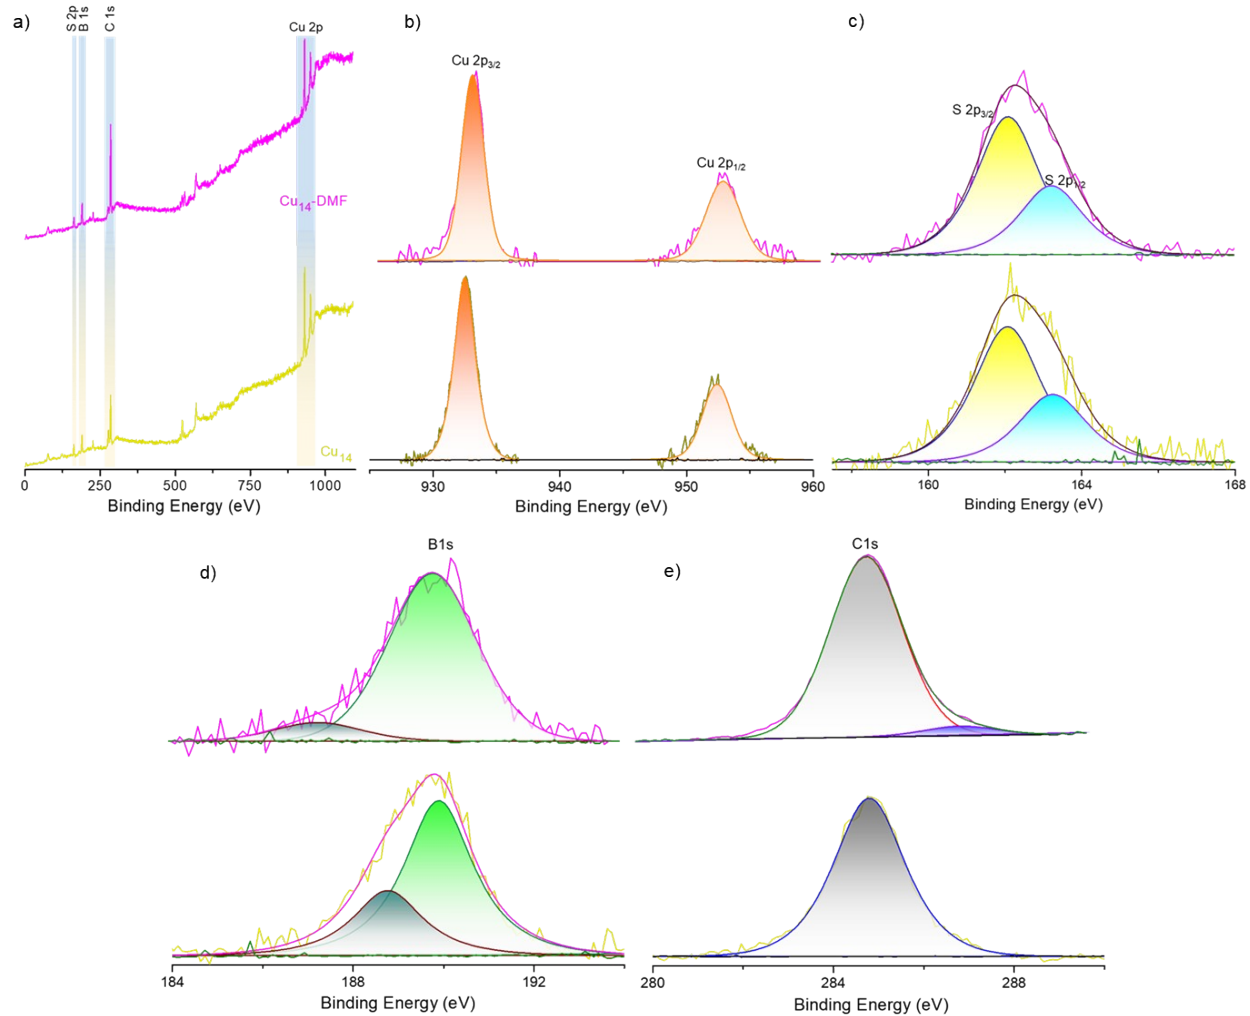

**Fig. S12** Comparative XPS spectra of  $\text{Cu}_{14}$  and  $\text{Cu}_{14}\text{-DMF}$  clusters. a) Survey spectra and selected spectral fittings of b) Cu 2p, c) S 2p, d) B 1s, and e) C 1s regions. Color code of the spectrum: brown line:  $\text{Cu}_{14}$  and pink line:  $\text{Cu}_{14}\text{-DMF}$ .

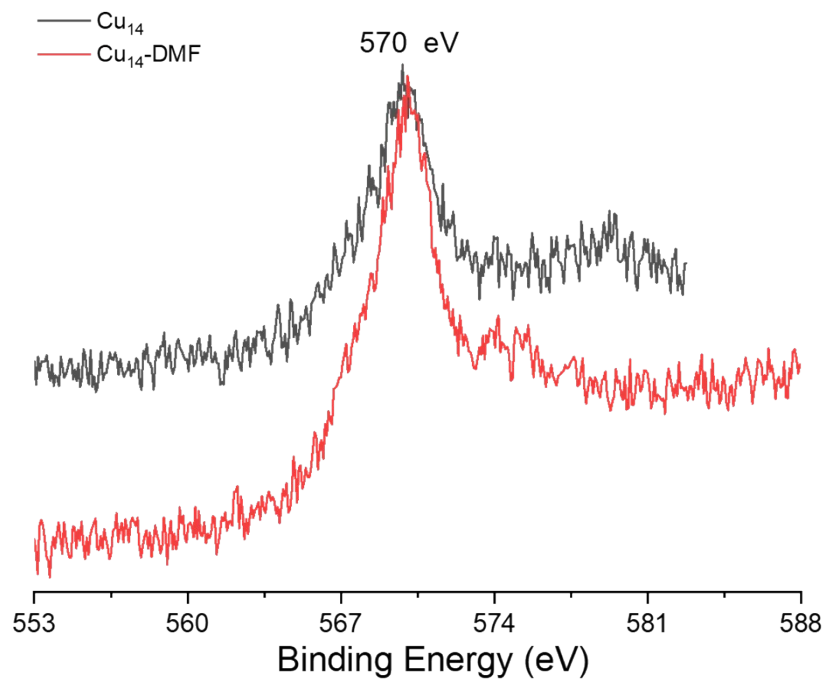

**Fig. S13** Comparative Cu LMM Auger spectra of  $\text{Cu}_{14}$  and  $\text{Cu}_{14}$ -DMF clusters.

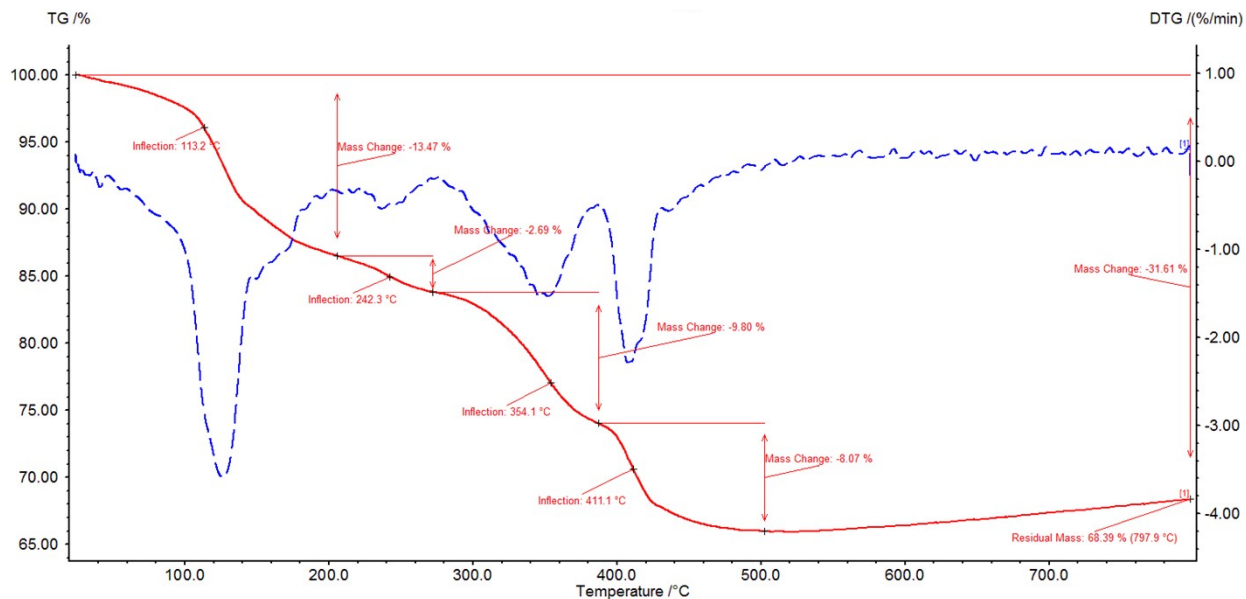

**Fig. S14** Thermogravimetric (TG) and differential TG analysis of  $\text{Cu}_{14}$  cluster under nitrogen atmosphere at a flow rate of 20 ml/min. The heating gradient was 10 K/min.

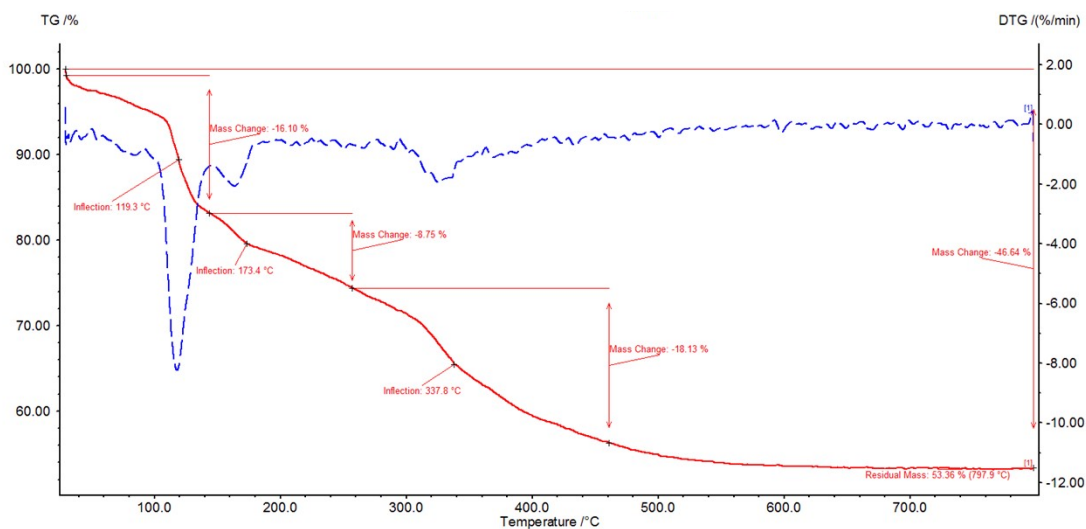

**Fig. S15** Thermogravimetric (TG) and differential TG analysis of  $\text{Cu}_{14}$ -DMF cluster under nitrogen atmosphere at a flow rate of 20 ml/min. The heating gradient was 10 K/min.

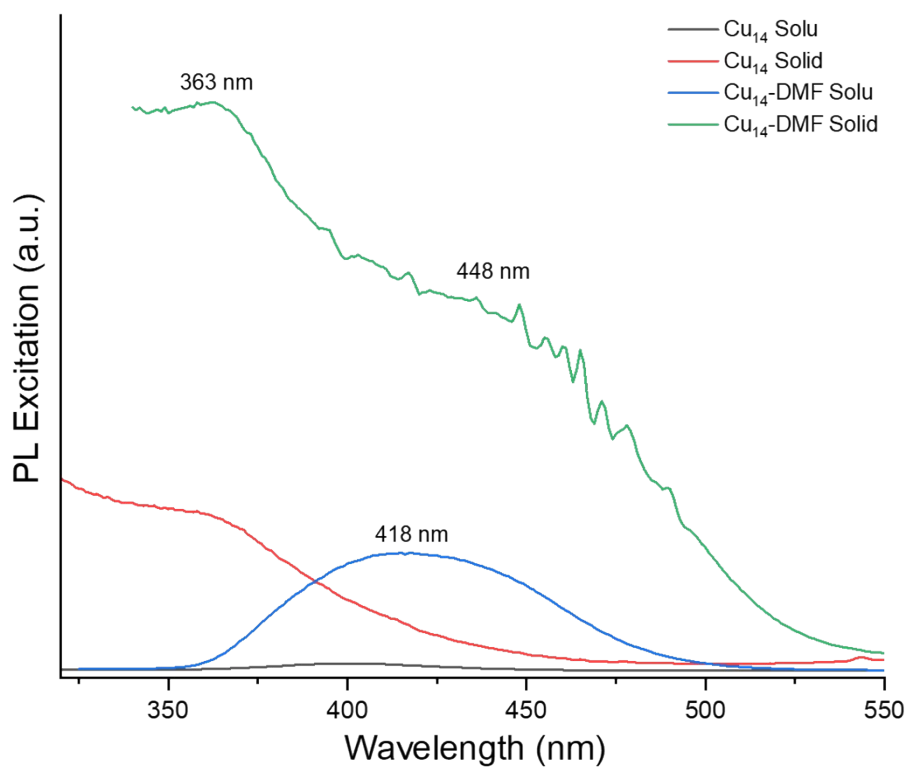

**Fig. S16** Photoluminescence excitation spectra of  $\text{Cu}_{14}$  and  $\text{Cu}_{14}$ -DMF clusters in their respective states.

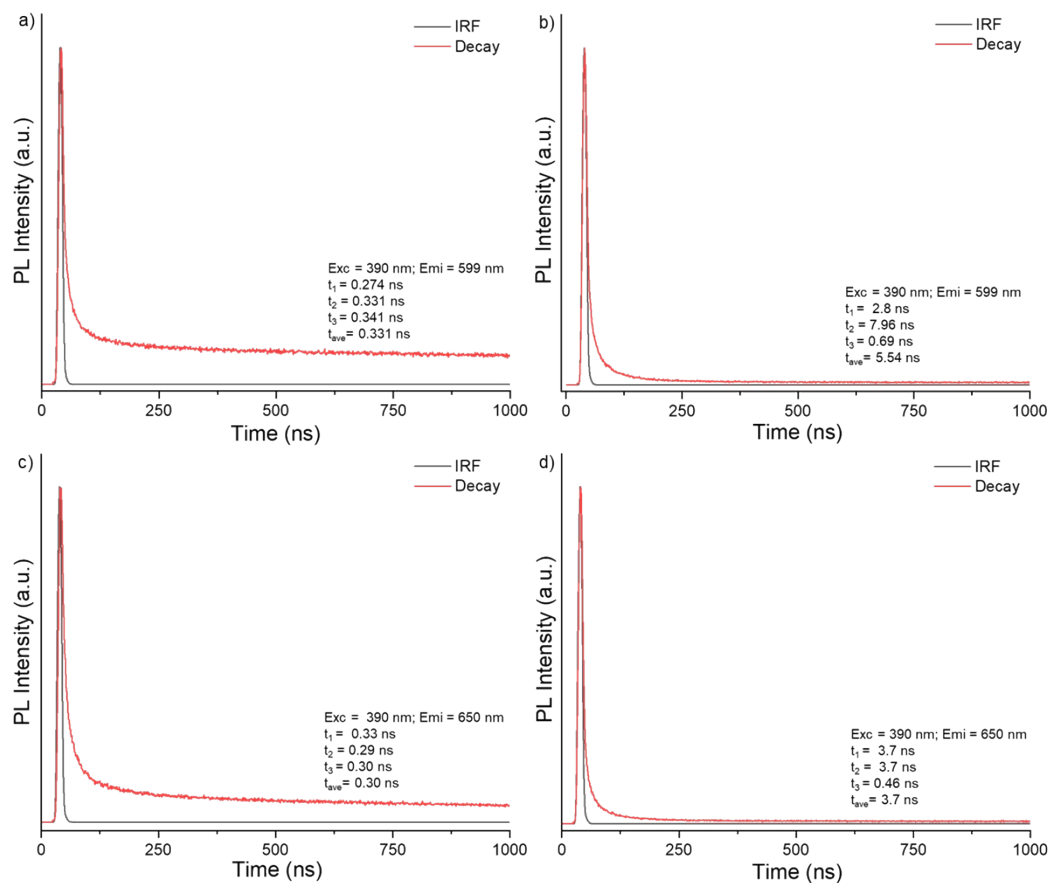

**Fig. S17** Luminescence decay profiles and respective decay times of as prepared  $\text{Cu}_{14}$  cluster in a) DCM solution and b) solid state and  $\text{Cu}_{14}$ -DMF cluster in c) DMF solution and d) solid state.

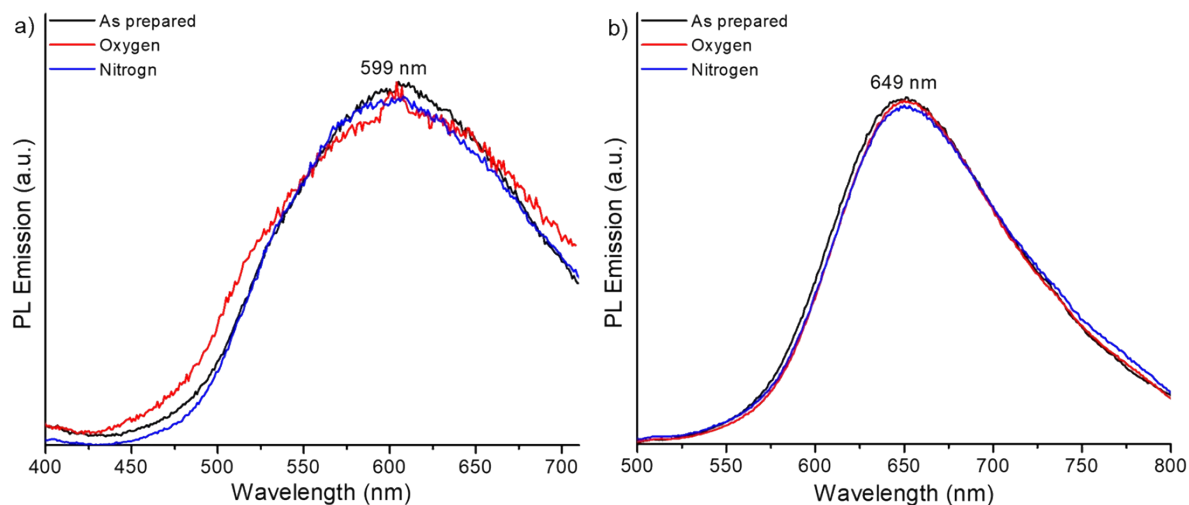

**Fig. S18** PL emission spectra of a)  $\text{Cu}_{14}$  and b)  $\text{Cu}_{14}$ -DMF in their respective solutions showed no change in their emission intensity upon oxygen exposure.

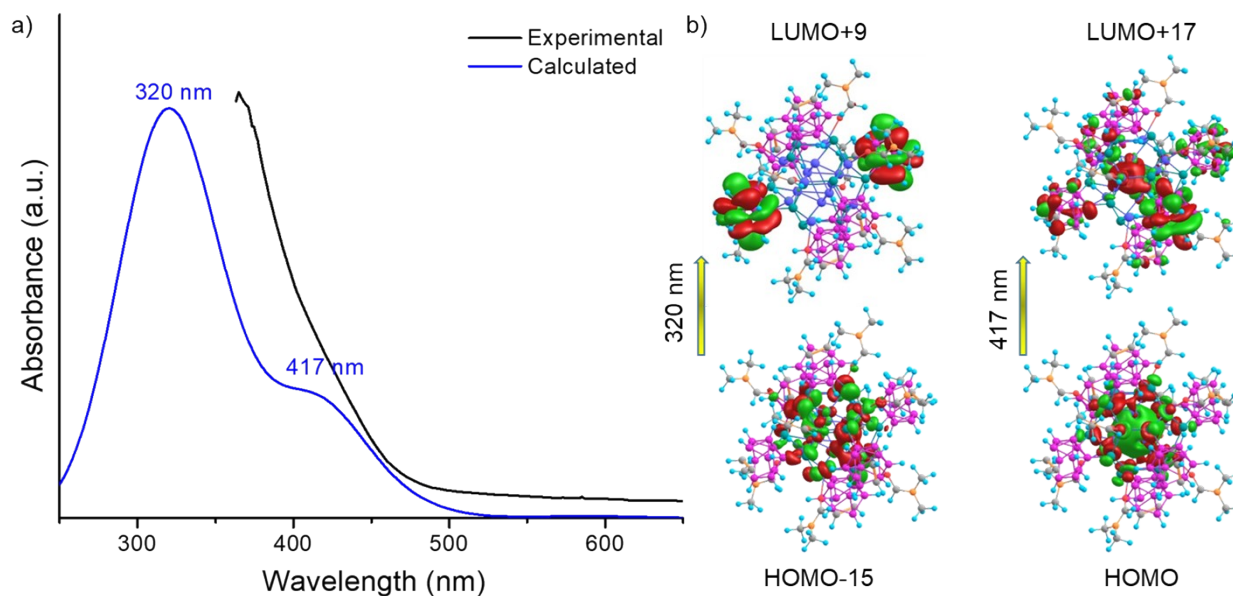

**Fig. S19** a) Comparative UV-vis absorption spectrum of  $\text{Cu}_{14}$ -DMF cluster shows the matching of the experimental and simulated spectrum. b) Molecular orbitals associated with the respective absorption features.

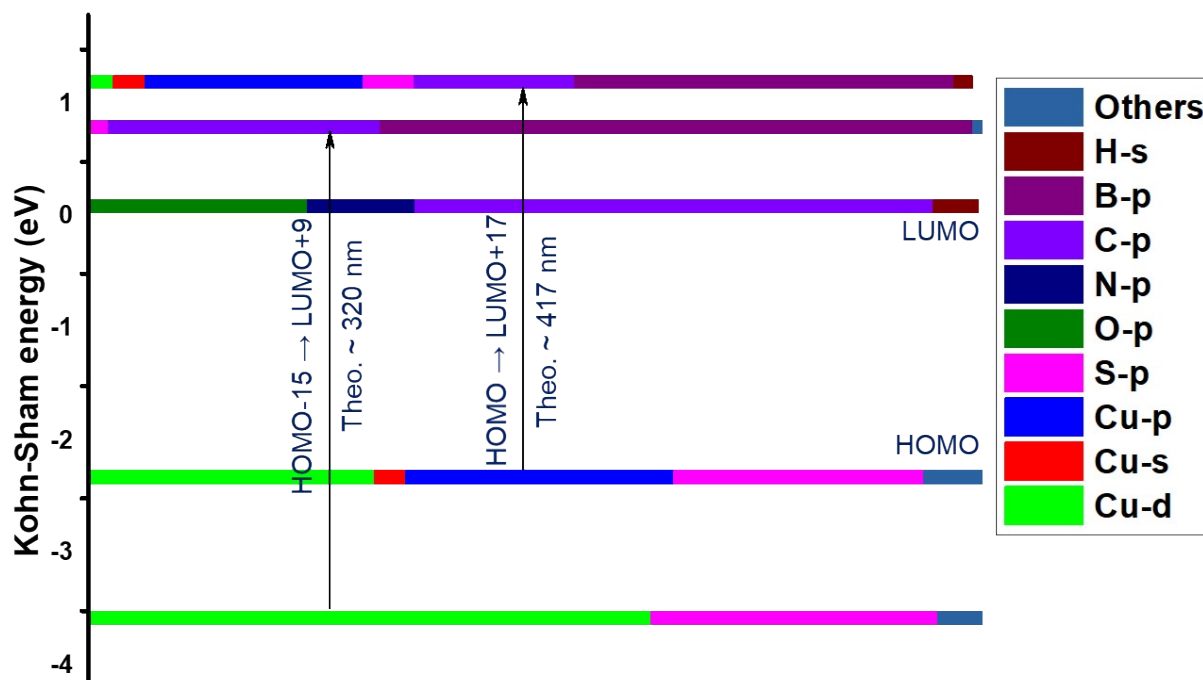

**Fig. S20** Kohn-Sham electronic energy level diagram for  $\text{Cu}_{14}$ -DMF cluster. Electronic transitions of the optical absorption features are marked here.

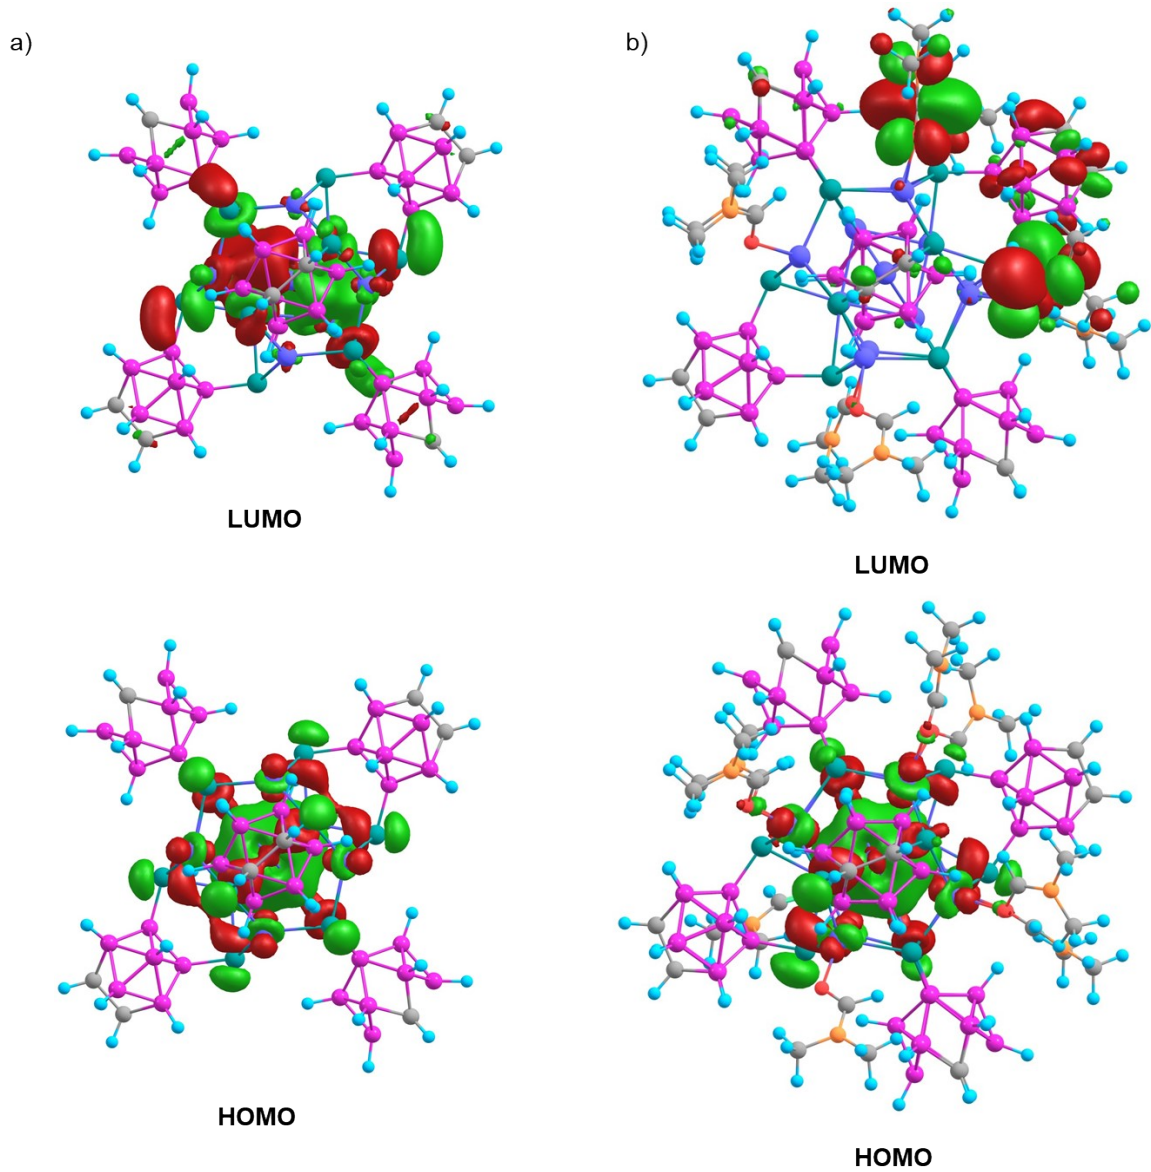

**Fig. S21** Frontier molecular orbitals of a)  $\text{Cu}_{14}$  and b)  $\text{Cu}_{14}$ -DMF clusters.

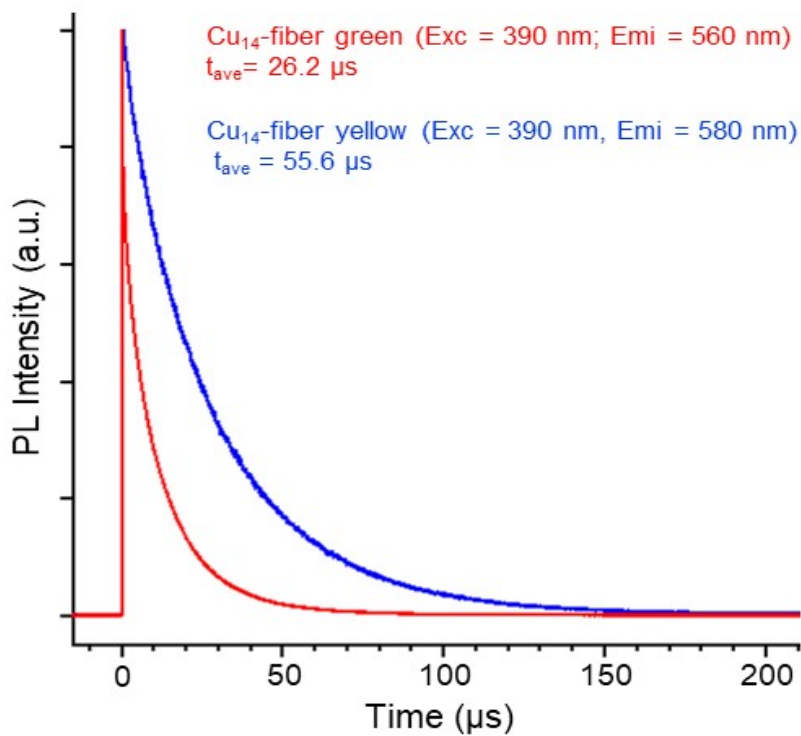

**Fig. S22** Luminescence decay profiles of green and yellow emitting Cu<sub>14</sub>-fibers at room temperature.

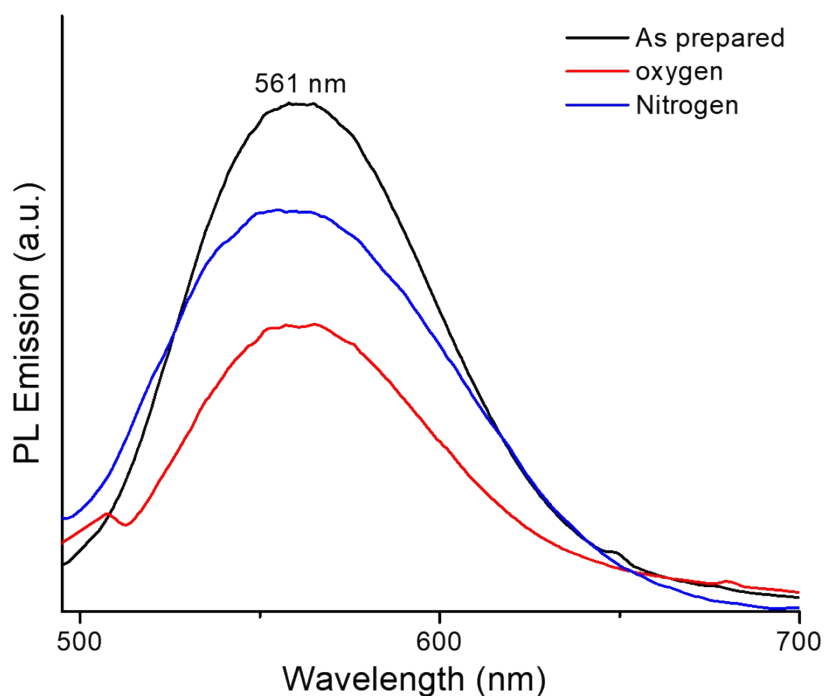

**Fig. S23** Comparative PL studies were conducted on green emitting Cu<sub>14</sub>-fibers, both pre- and post-exposure to oxygen gas. Subsequently, nitrogen was introduced after the oxygen exposure. Excitation was at 400 nm.

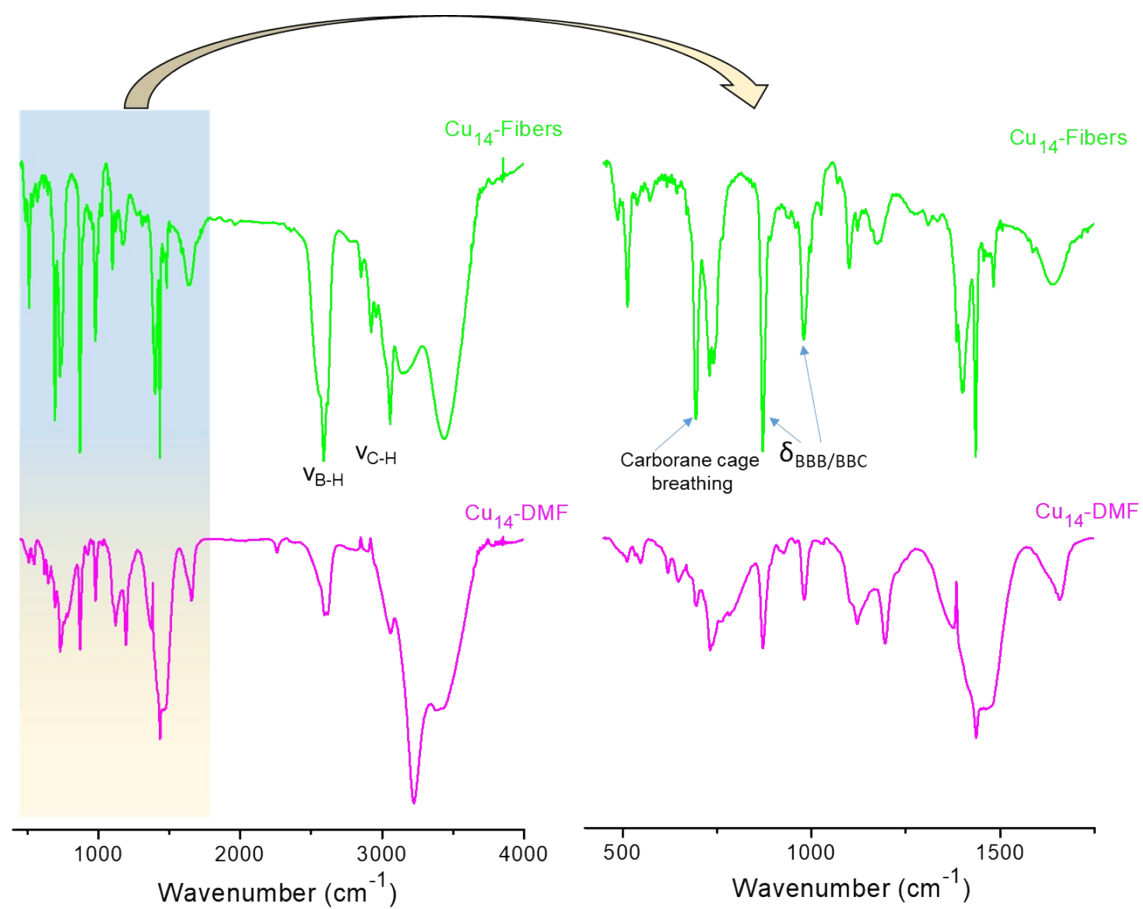

**Fig. S24** Comparative IR spectra of  $\text{Cu}_{14}$ -DMF cluster and  $\text{Cu}_{14}$ -fibers.



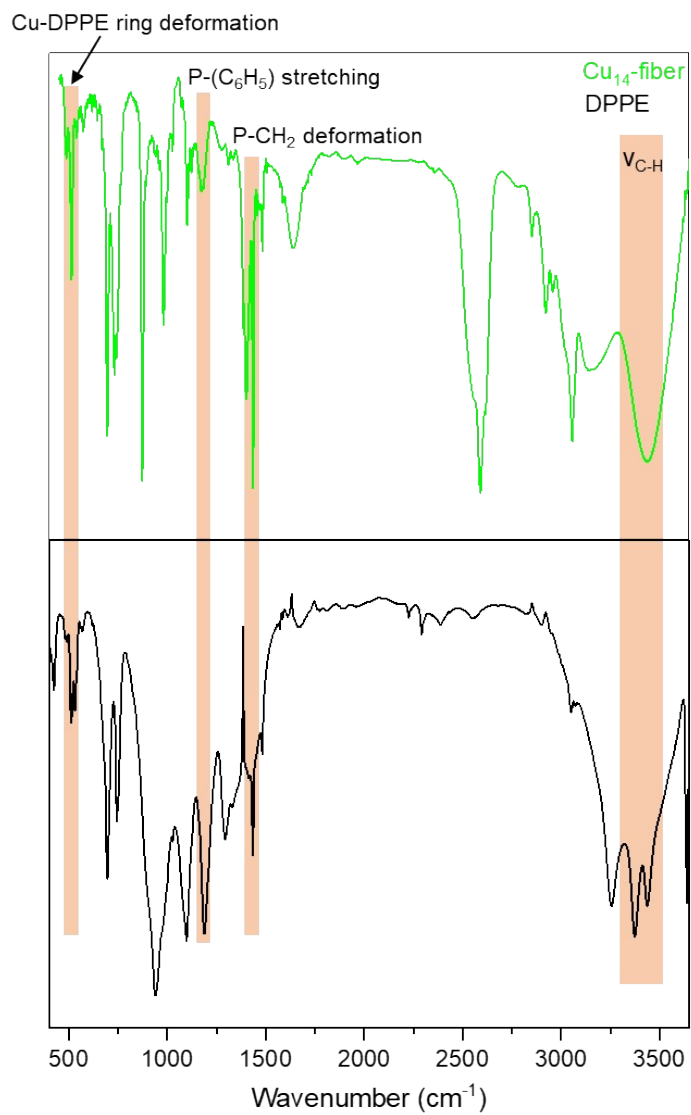

**Fig. S25** Comparative IR spectra of free DPPE and Cu<sub>14</sub>-fibers. Minor variations in the highlighted peak positions indicate the binding of DPPE to the cluster.

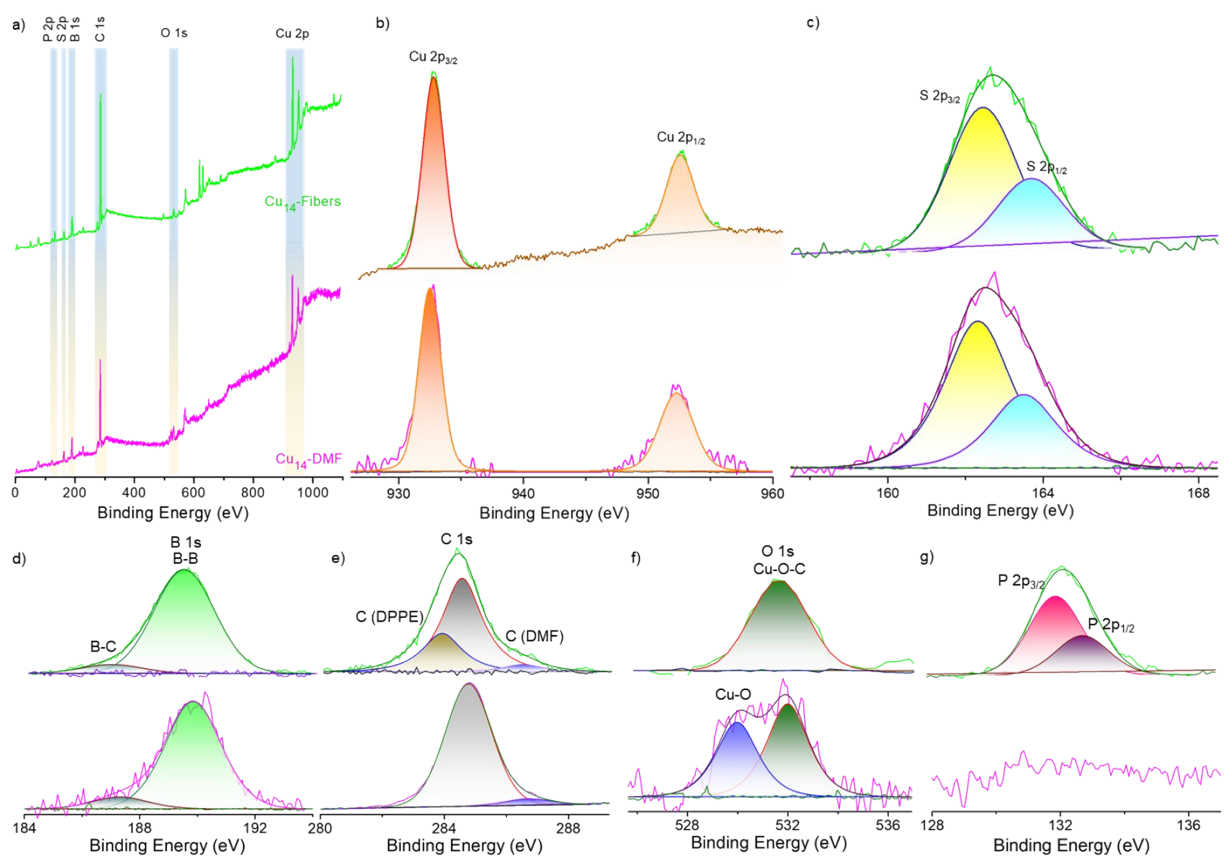

**Fig. S26** Comparative XPS a) survey spectra of Cu<sub>14</sub>-DMF and Cu<sub>14</sub>-fibers. Selected area spectral fittings of b) Cu 2p, c) S 2p, d) B 1s, e) C 1s, f) O 1s, g) P 2p regions. Color code: green line = Cu<sub>14</sub>-fibers, pink = Cu<sub>14</sub>-DMF.

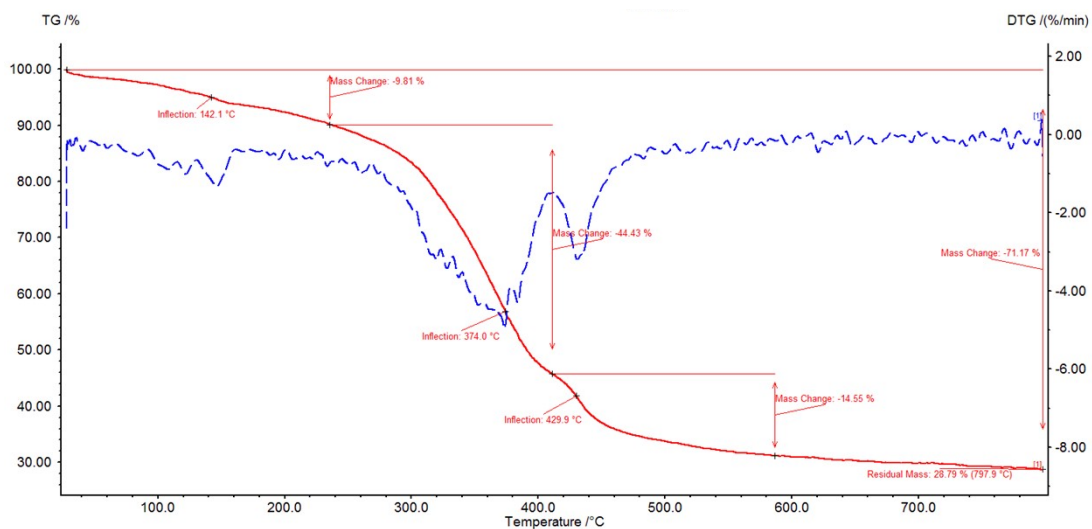

**Fig. S27** Thermogravimetric (TG) and differential TG analysis of Cu<sub>14</sub>-fibers under nitrogen atmosphere at a flow rate of 20 ml/min. The heating rate was 10 K/ min.

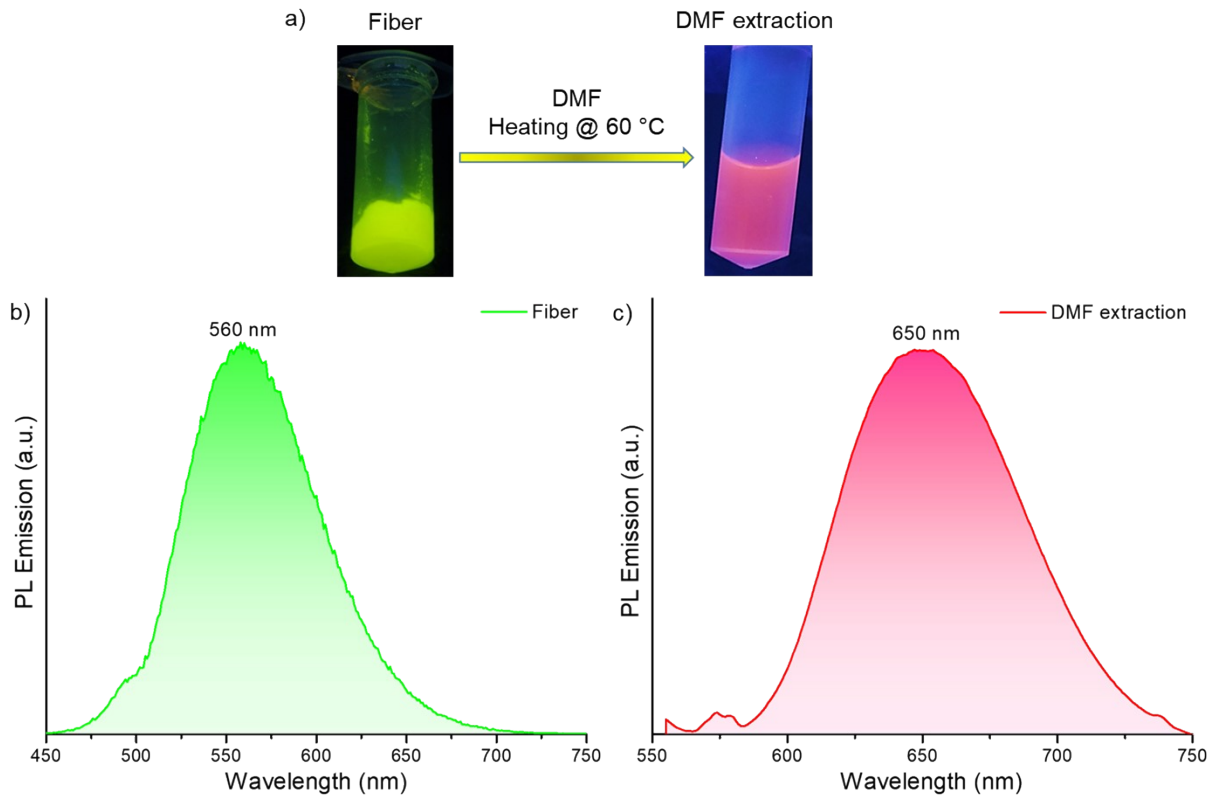

**Fig. S28** a) Photographs of the  $\text{Cu}_{14}$ -fibers under UV light and after its extraction in DMF. PL emission profiles of the b) fiber, and c) the extracted DMF solution.

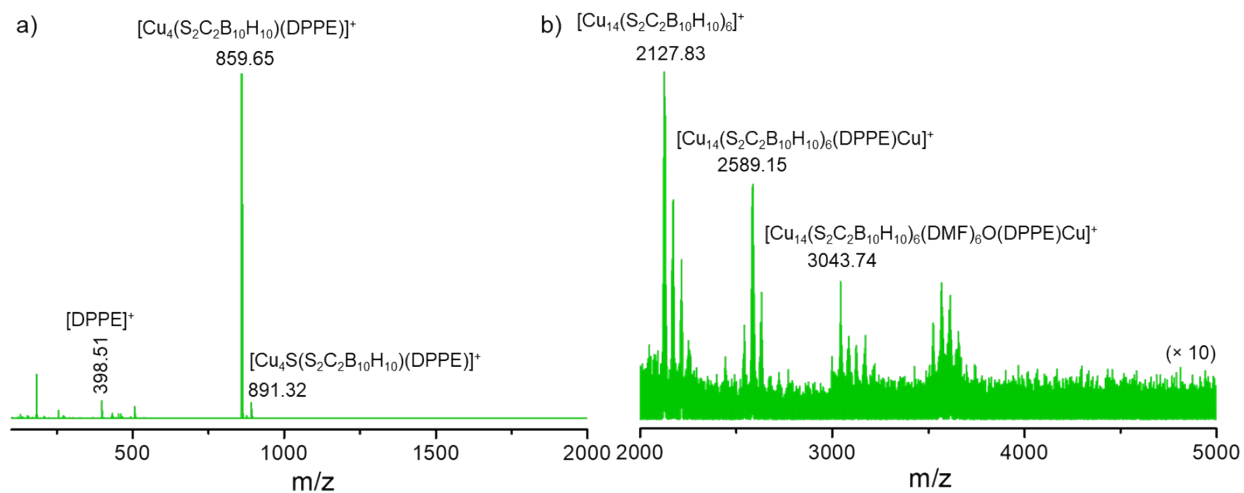

**Fig. S29** Positive ion mode ESI-MS spectrum of  $\text{Cu}_{14}$ -fibers after dissolving them in DMF. a) Mass range of  $m/z$  100-2000 and b) expanded view of the spectrum in the mass range of  $m/z$  2000-5000. Peaks of interest are marked here.

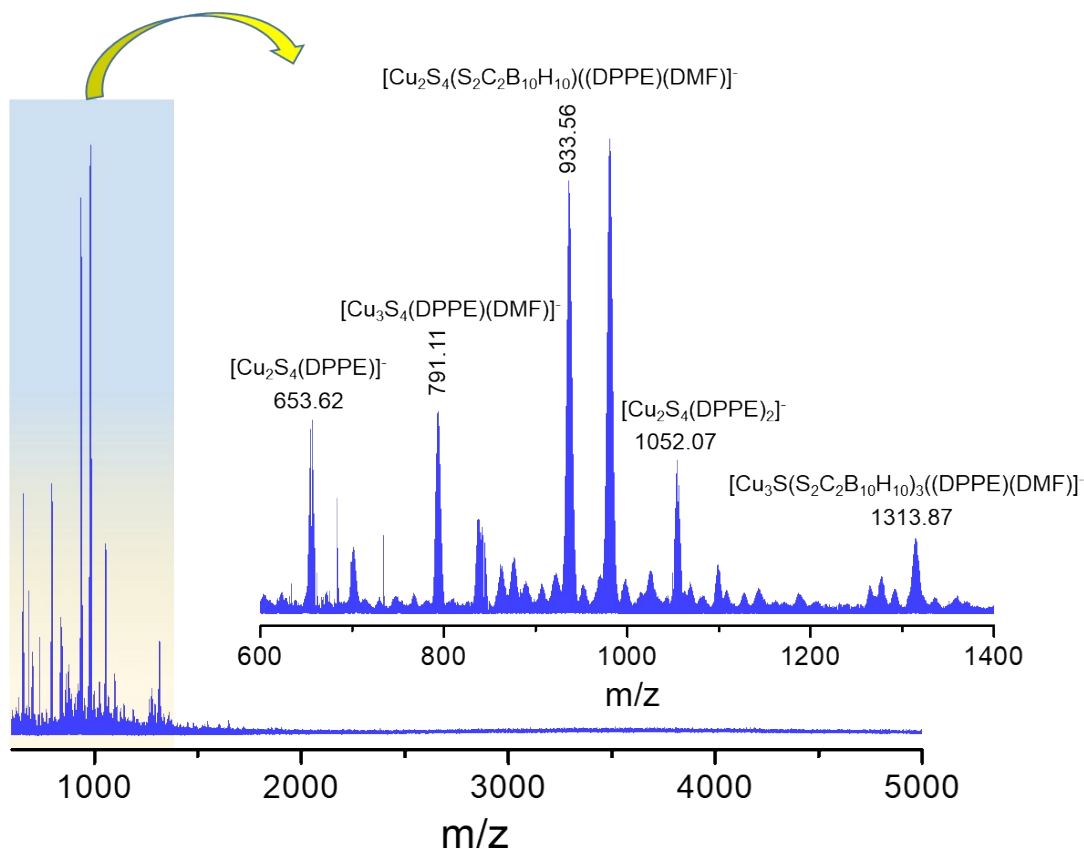

**Fig. S30** Full range negative ion mode ESI-MS spectrum of  $\text{Cu}_{14}$ -fibers after dissolving them in DMF. Inset shows an expanded view of the spectrum along with the respective peaks are marked here. Appearance of DPPE attached Cu peaks indicate the 1D assembly of DPPE linkers with the clusters.

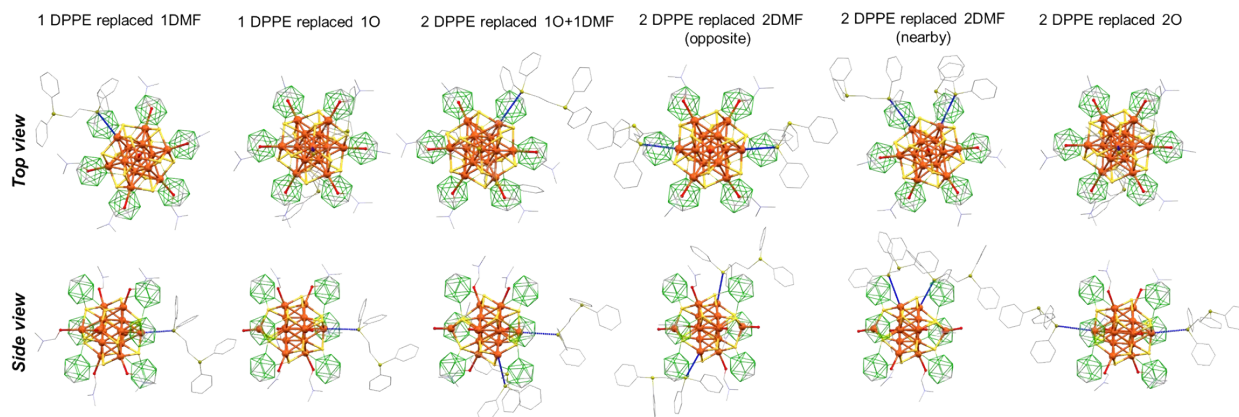

**Fig. S31** Optimized structural models of most probable bindings of DPPE linkers with the  $\text{Cu}_{14}$ -DMF cluster. Hydrogen atoms are removed for clarity. Color codes: orange = copper, yellow = sulfur, green = boron, grey = carbon, red = oxygen and brown = phosphorus.

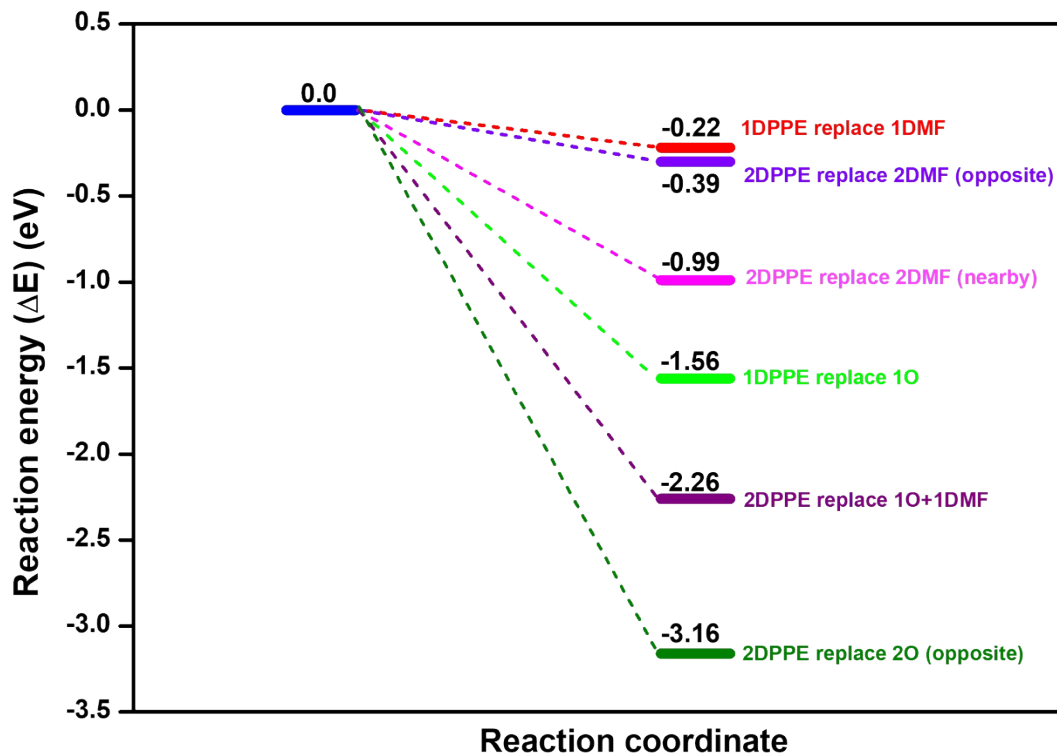

**Fig. S32** A comparative energy profile of the probable binding of DPPE linkers at various positions of the  $\text{Cu}_{14}$ -DMF cluster.

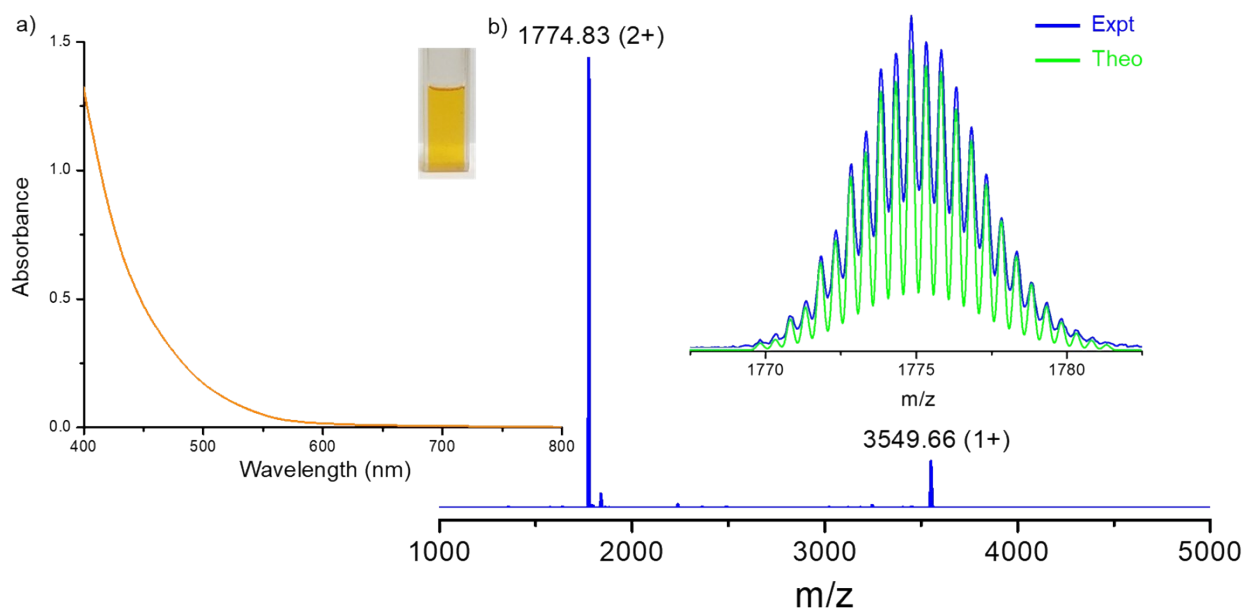

**Fig. S33** a) UV-vis absorption spectrum of  $[\text{Cu}_{18}(\text{DPPE})_6\text{H}_{16}]$  nanocluster. Inset shows the photographic image of the cluster in DCM. b) Full range mass spectrum of the  $\text{Cu}_{18}$  cluster in positive ion mode shows the presence of di- (at  $m/z$  1774.83) and mono- cationic (at  $m/z$  3549.66) species for the cluster. Inset shows

the exact matching of the isotopic distributions of the experimental and theoretical spectra for the 2+ charge state species.

## References

1. A. Jana, M. Jash, W. A. Dar, J. Roy, P. Chakraborty, G. Paramasivam, S. Lebedkin, K. Kirakci, S. Manna, S. Antharjanam, J. Machacek, M. Kucerakova, S. Ghosh, K. Lang, M. M. Kappes, T. Base and T. Pradeep, *Chem. Sci.*, 2023, **14**, 1613–1626.
2. Frisch, M. J.; Trucks, G. W.; Schlegel, H. B.; Scuseria, G. E.; Robb, M. A.; Cheeseman, J. R.; Scalmani, G.; Barone, V.; Mennucci, B.; Petersson, G. A. et al. Gaussian 09, Revision B.01; Gaussian Inc.: Wallingford, CT, **2009**.
3. A. D. Becke, *Phys. Rev. A: At., Mol., Opt. Phys.*, 1988, **38**, 3098–3100.
4. A. D. Becke, *J. Chem. Phys.*, 1993, **98**, 1372–1377.
5. W. J. Hehre, R. Ditchfield and J. A. Pople, *J. Chem. Phys.*, 1972, **56**, 2257–2261.
6. P. C. Hariharan and J. A. Pople, *Theor. Chim. Acta*, 1973, **28**, 213–222.
7. T. Lu and F. Chen, *J. Comput. Chem.*, 2012, **33**, 580–592.
